# Supplementary material for: Detection of Novel QTLs for Late Blight Resistance Derived from the Wild Potato Species Solanum microdontum and Solanum pampasense
Source: MDPI journal article supplement (doi:10.3390/genes11070732), 2020-06-30
Supplement: s1 [file s1]

# **Detection of novel QTLs for late blight resistance derived the wild potato species *Solanum microdontum* and *Solanum pampasense***

## ***Genes***

Fergus Meade, Ronald Hutten, Silke Wagner, Vanessa Prigge, Emmet Dalton, Hanne Grethe Kirk, Denis Griffin, Dan Milbourne

Correspondence: dan.milbourne@teagasc.ie

## **Genetic maps created using SNP markers identified using Genotyping-by-Sequencing of each population**

Page 1-2: Genetic map created using 1431 SNP markers of all types (segregating in the female parent <lmxll>; segregating in both parents <hkxhk>; segregating in the male parent <nnxnp>) of the MCD diploid population.

Page 3-4: Genetic map created using 752 SNP markers unique to the male parent of the MCD diploid population.

Page 5-16: Genetic map created using 967 SNP markers unique to the female parent of the PAM tetraploid population.

Page 17: Assignment of chr00 contigs to chromosomes based on MCD and PAM genetic maps.



# MCD genetic map (All marker types, chr01–chr06)

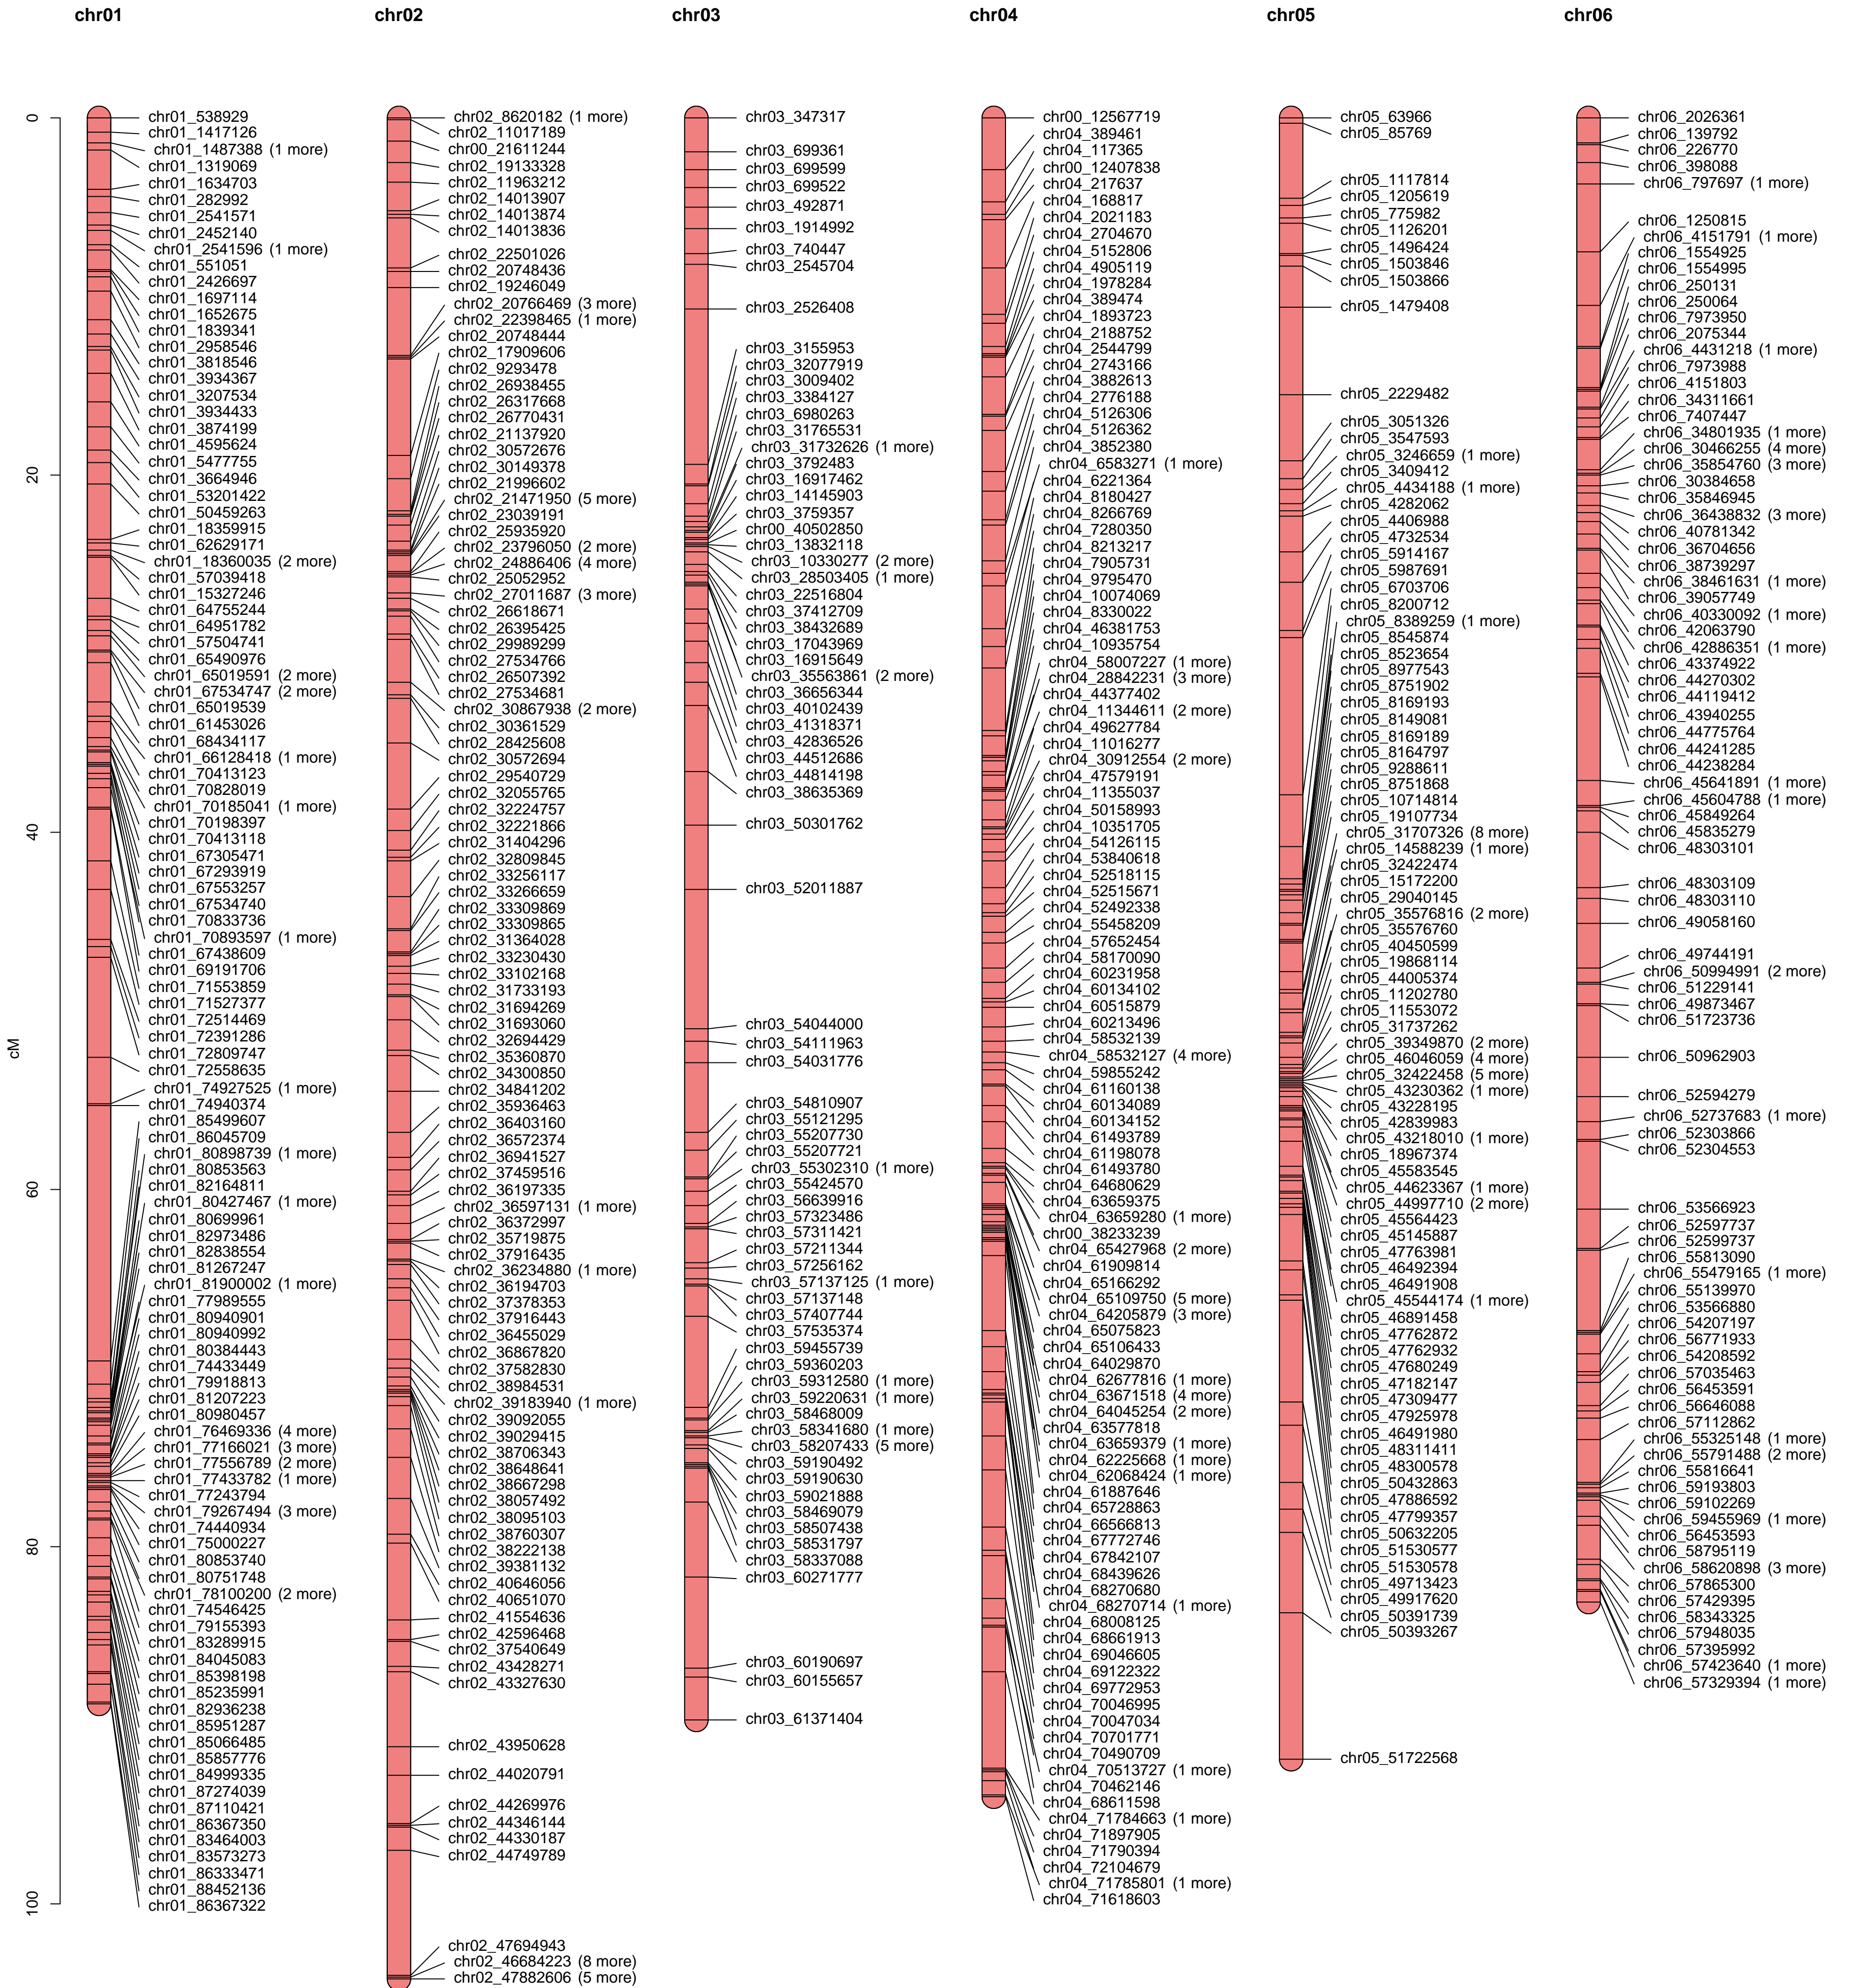



# MCD genetic map (All marker types, chr07–chr12)

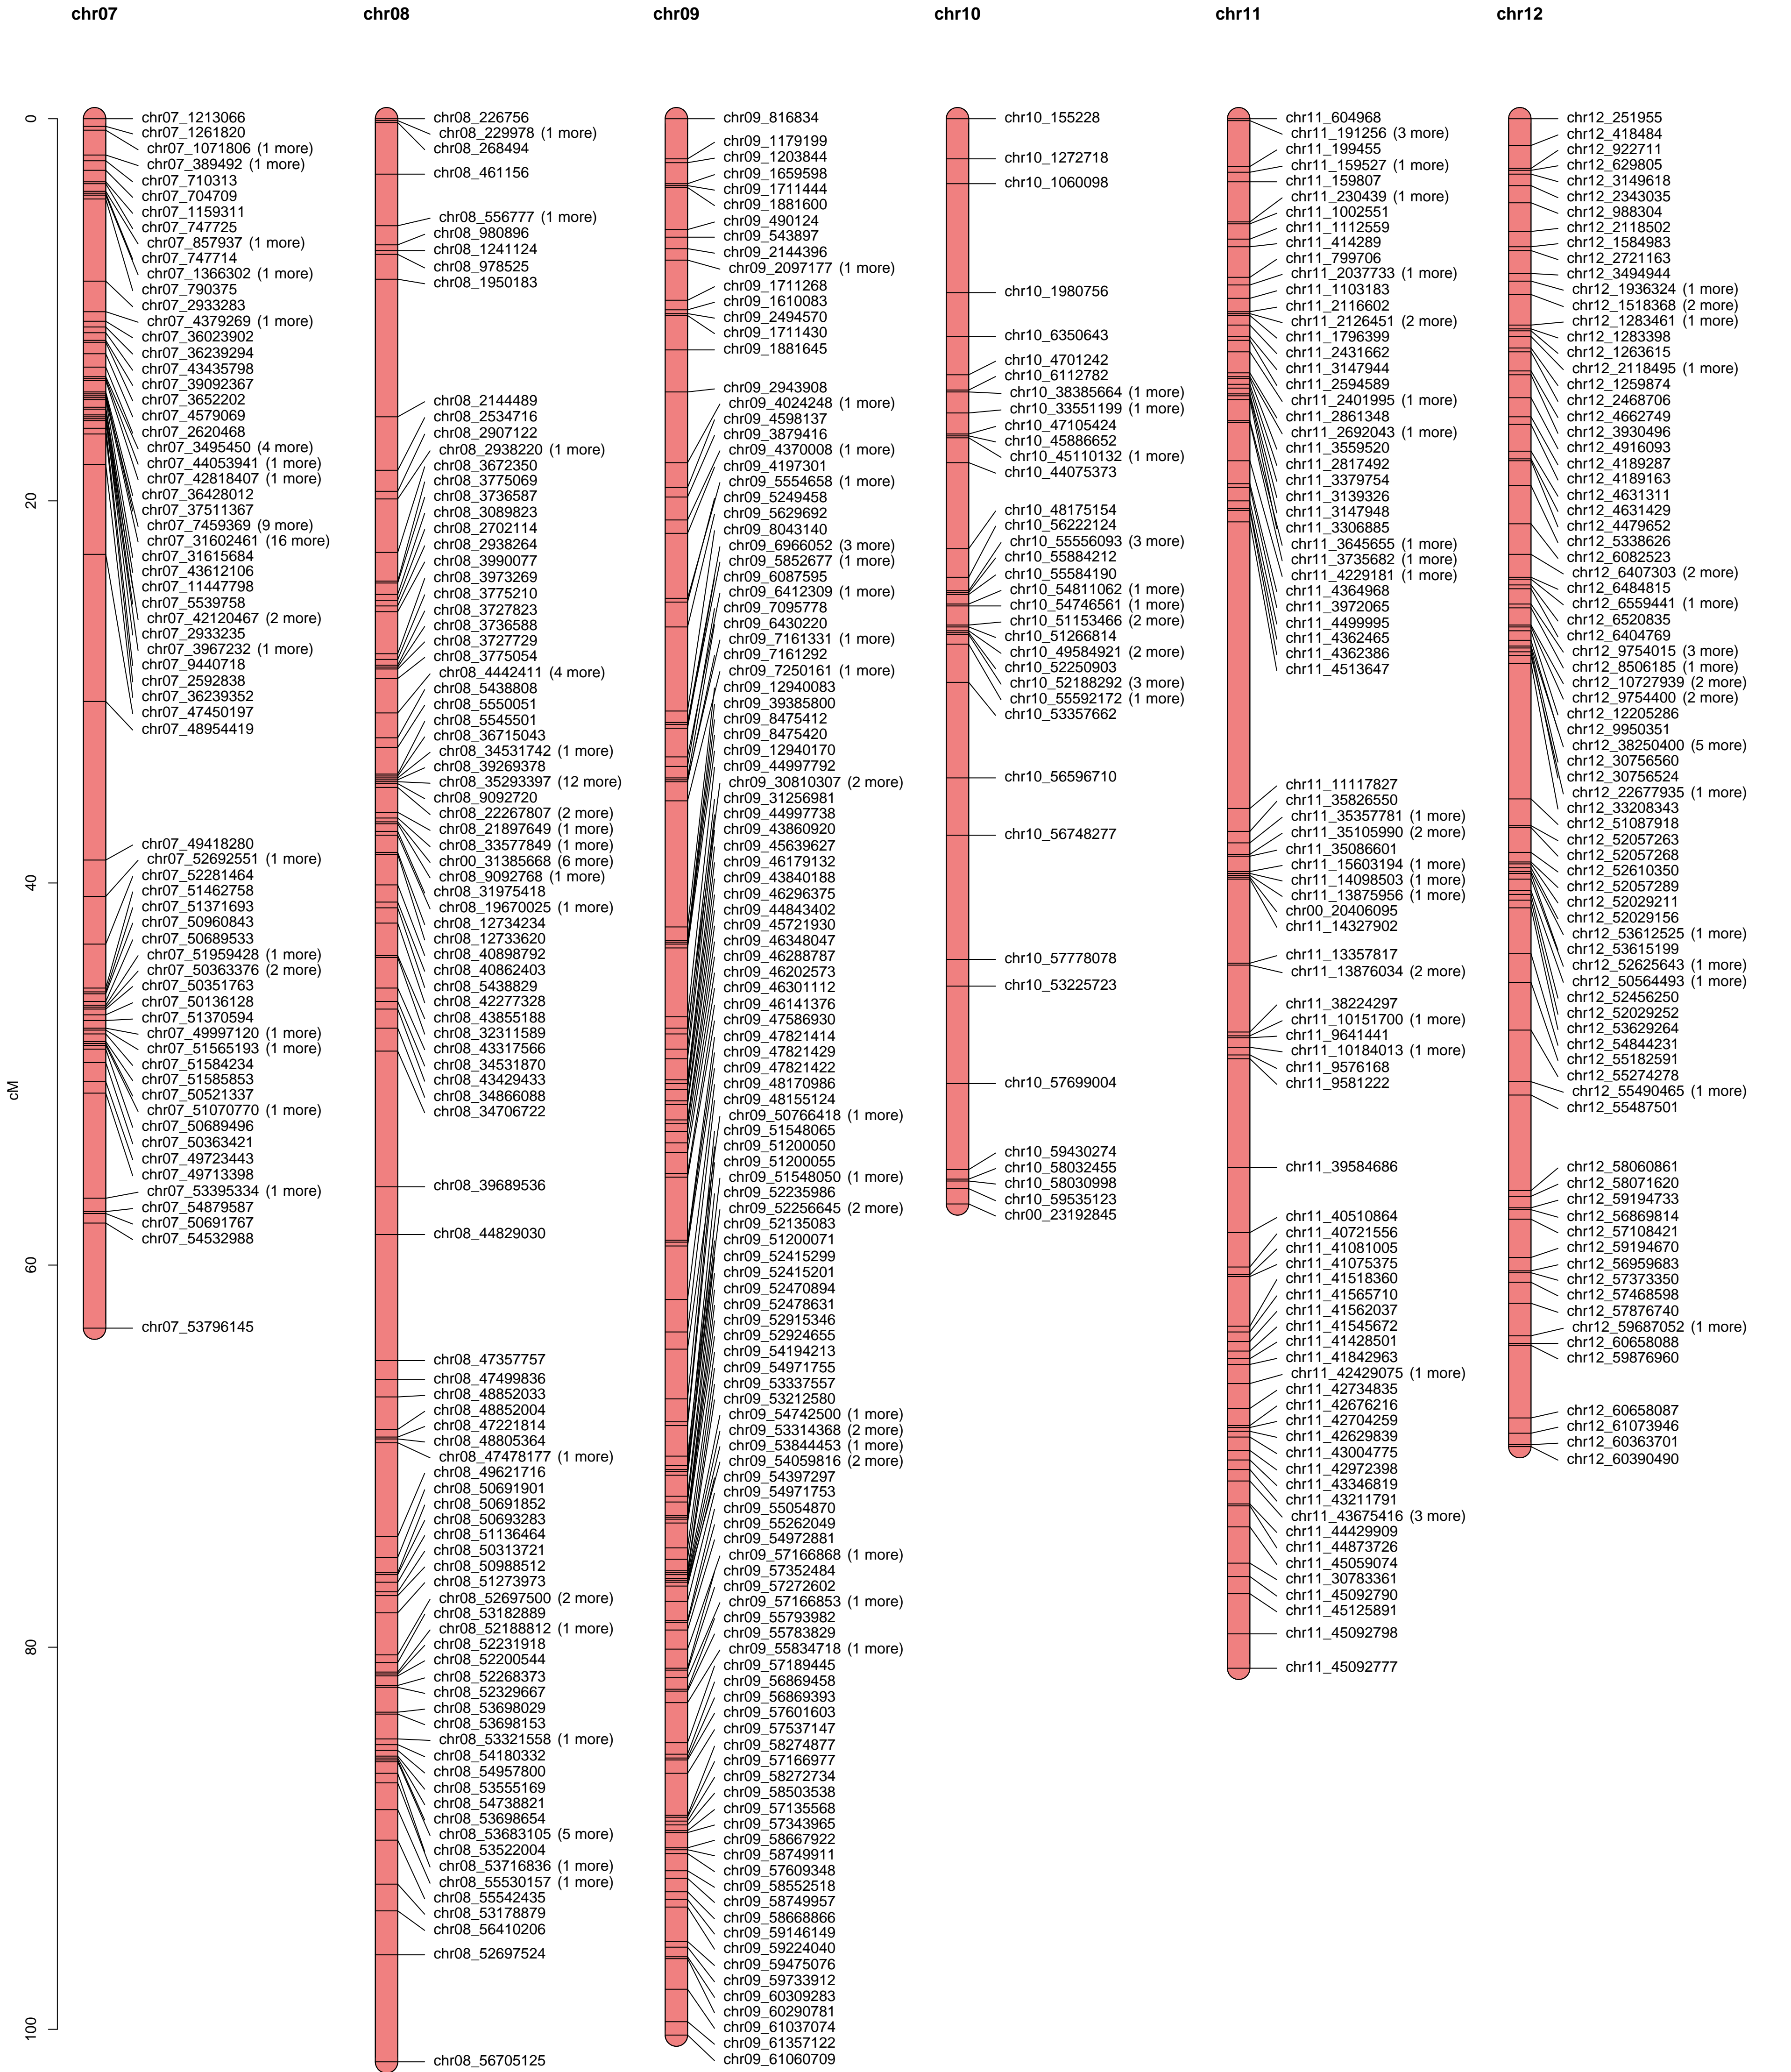



# MCD MALE genetic map (markers unique to IVP10–281–1, chr01–chr06)

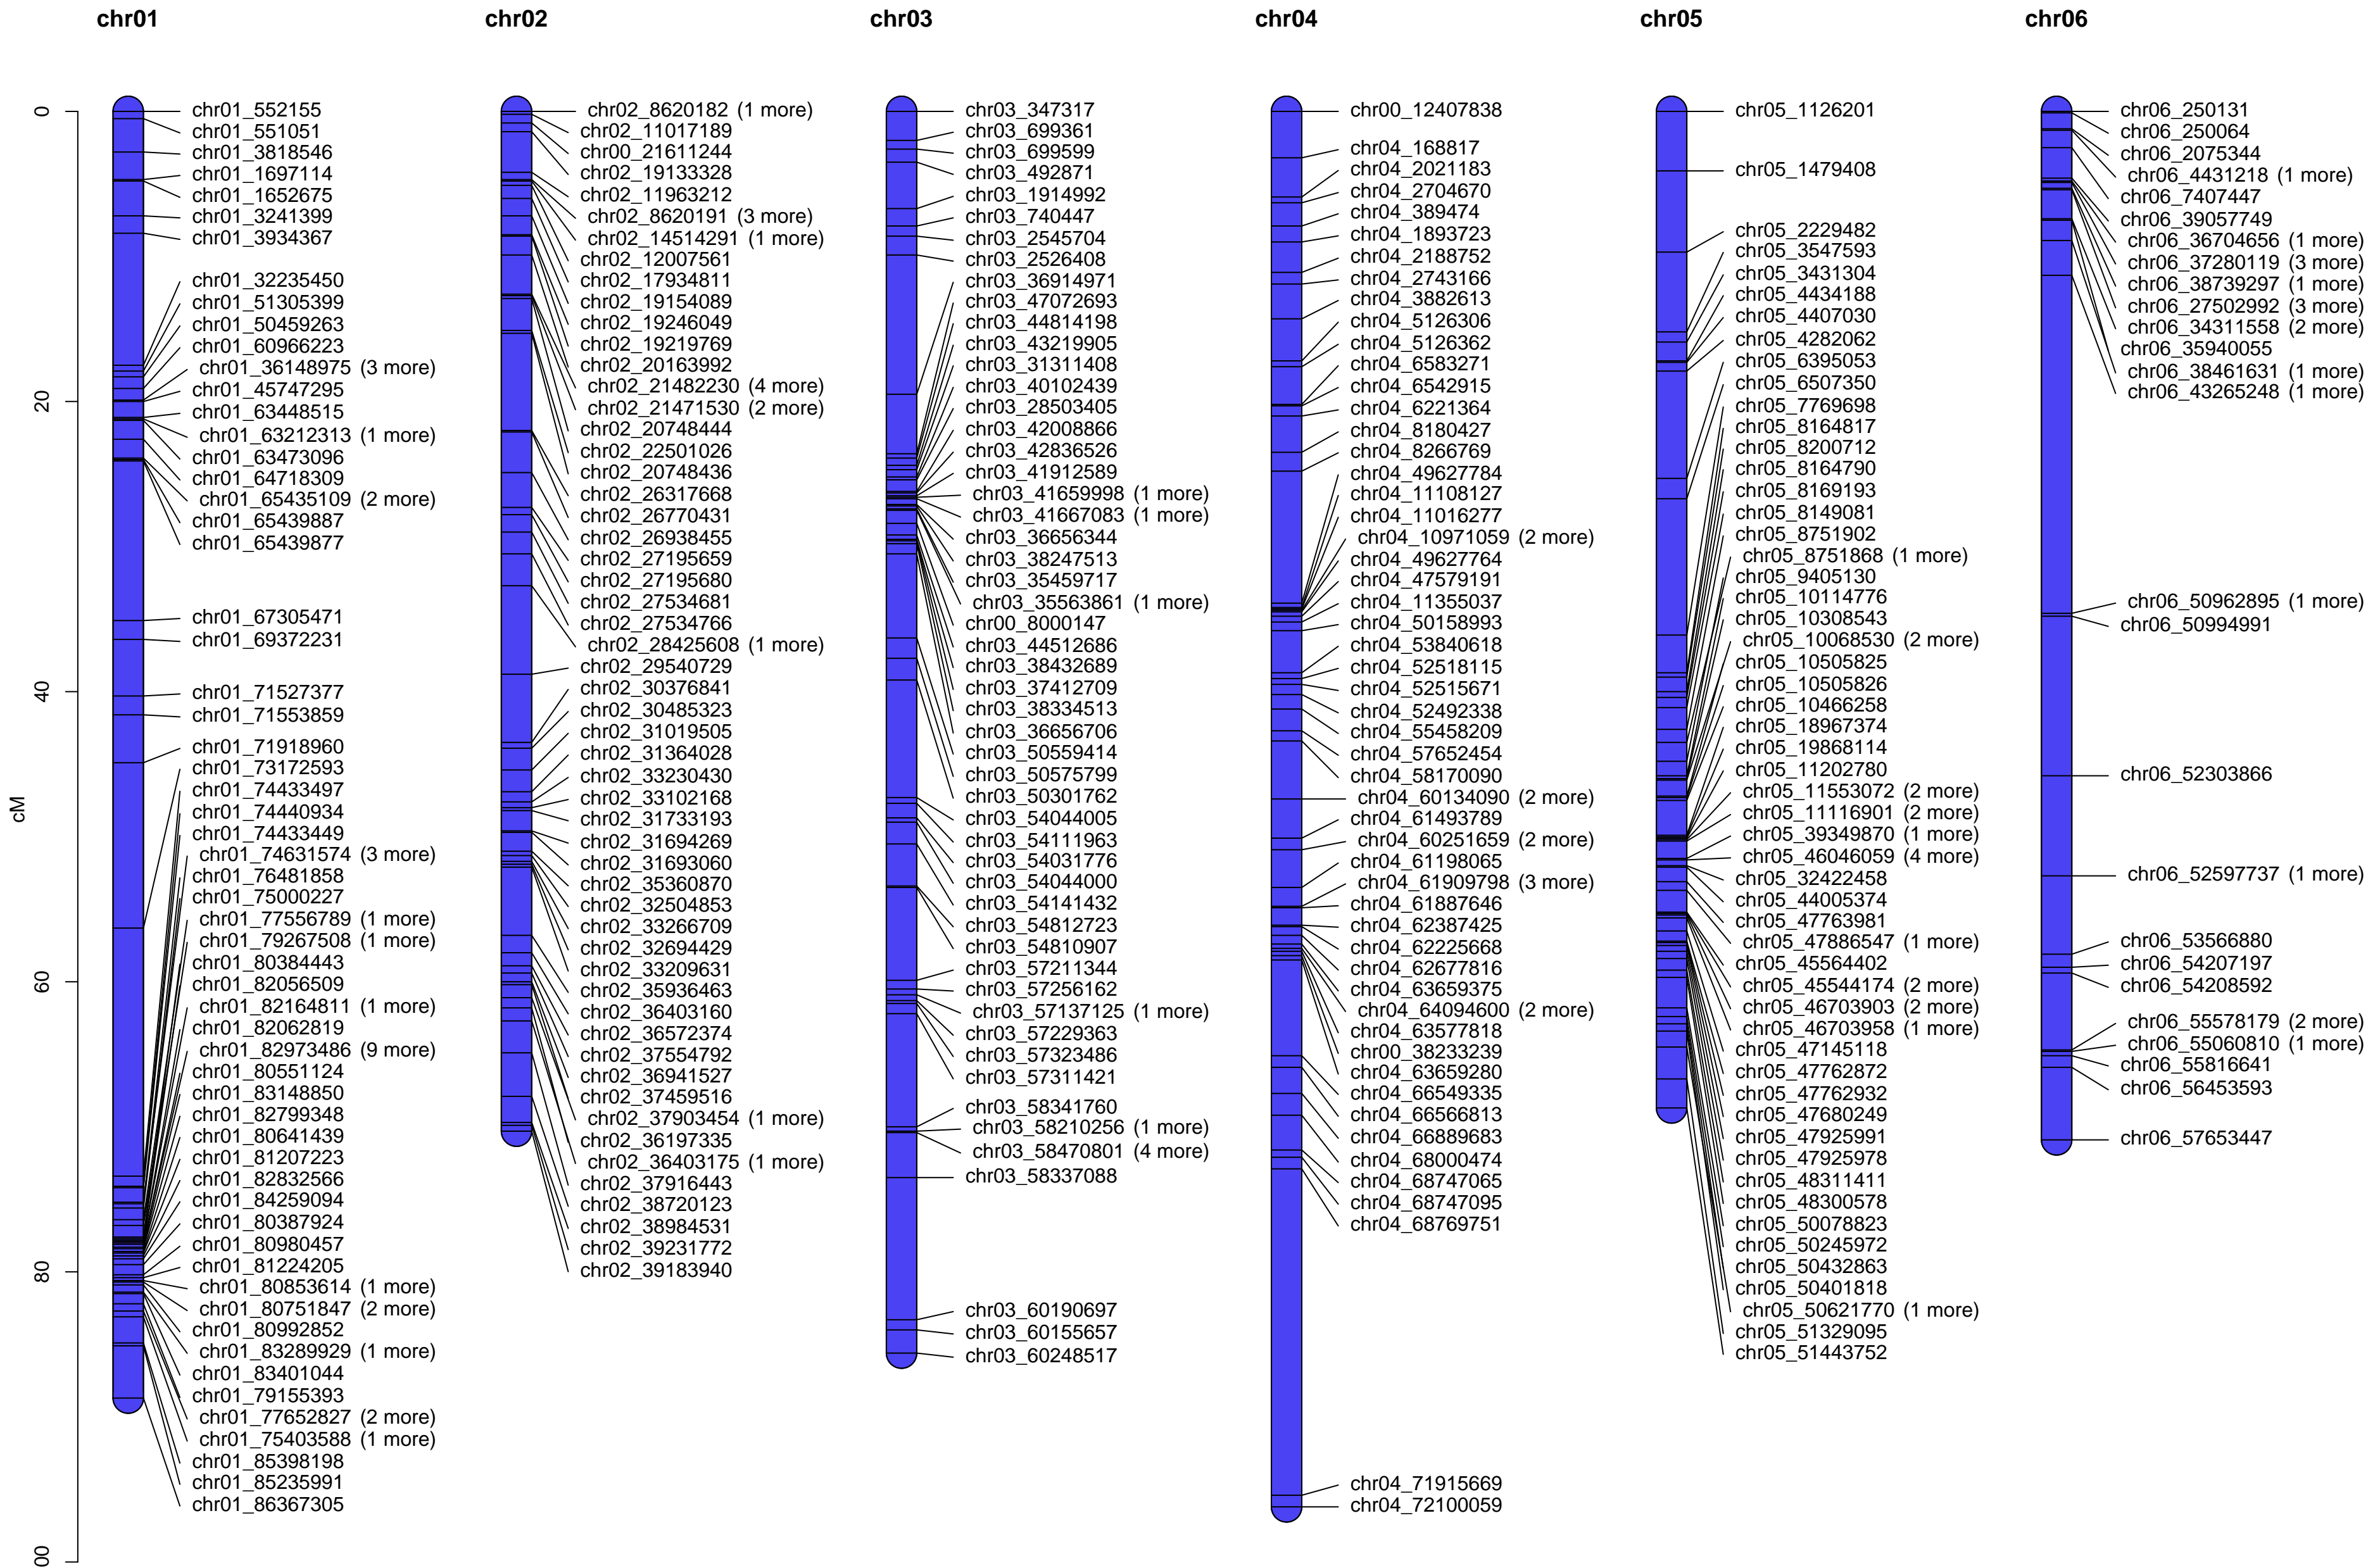



# MCD MALE genetic map (markers unique to IVP10-281-1, chr07-chr12)

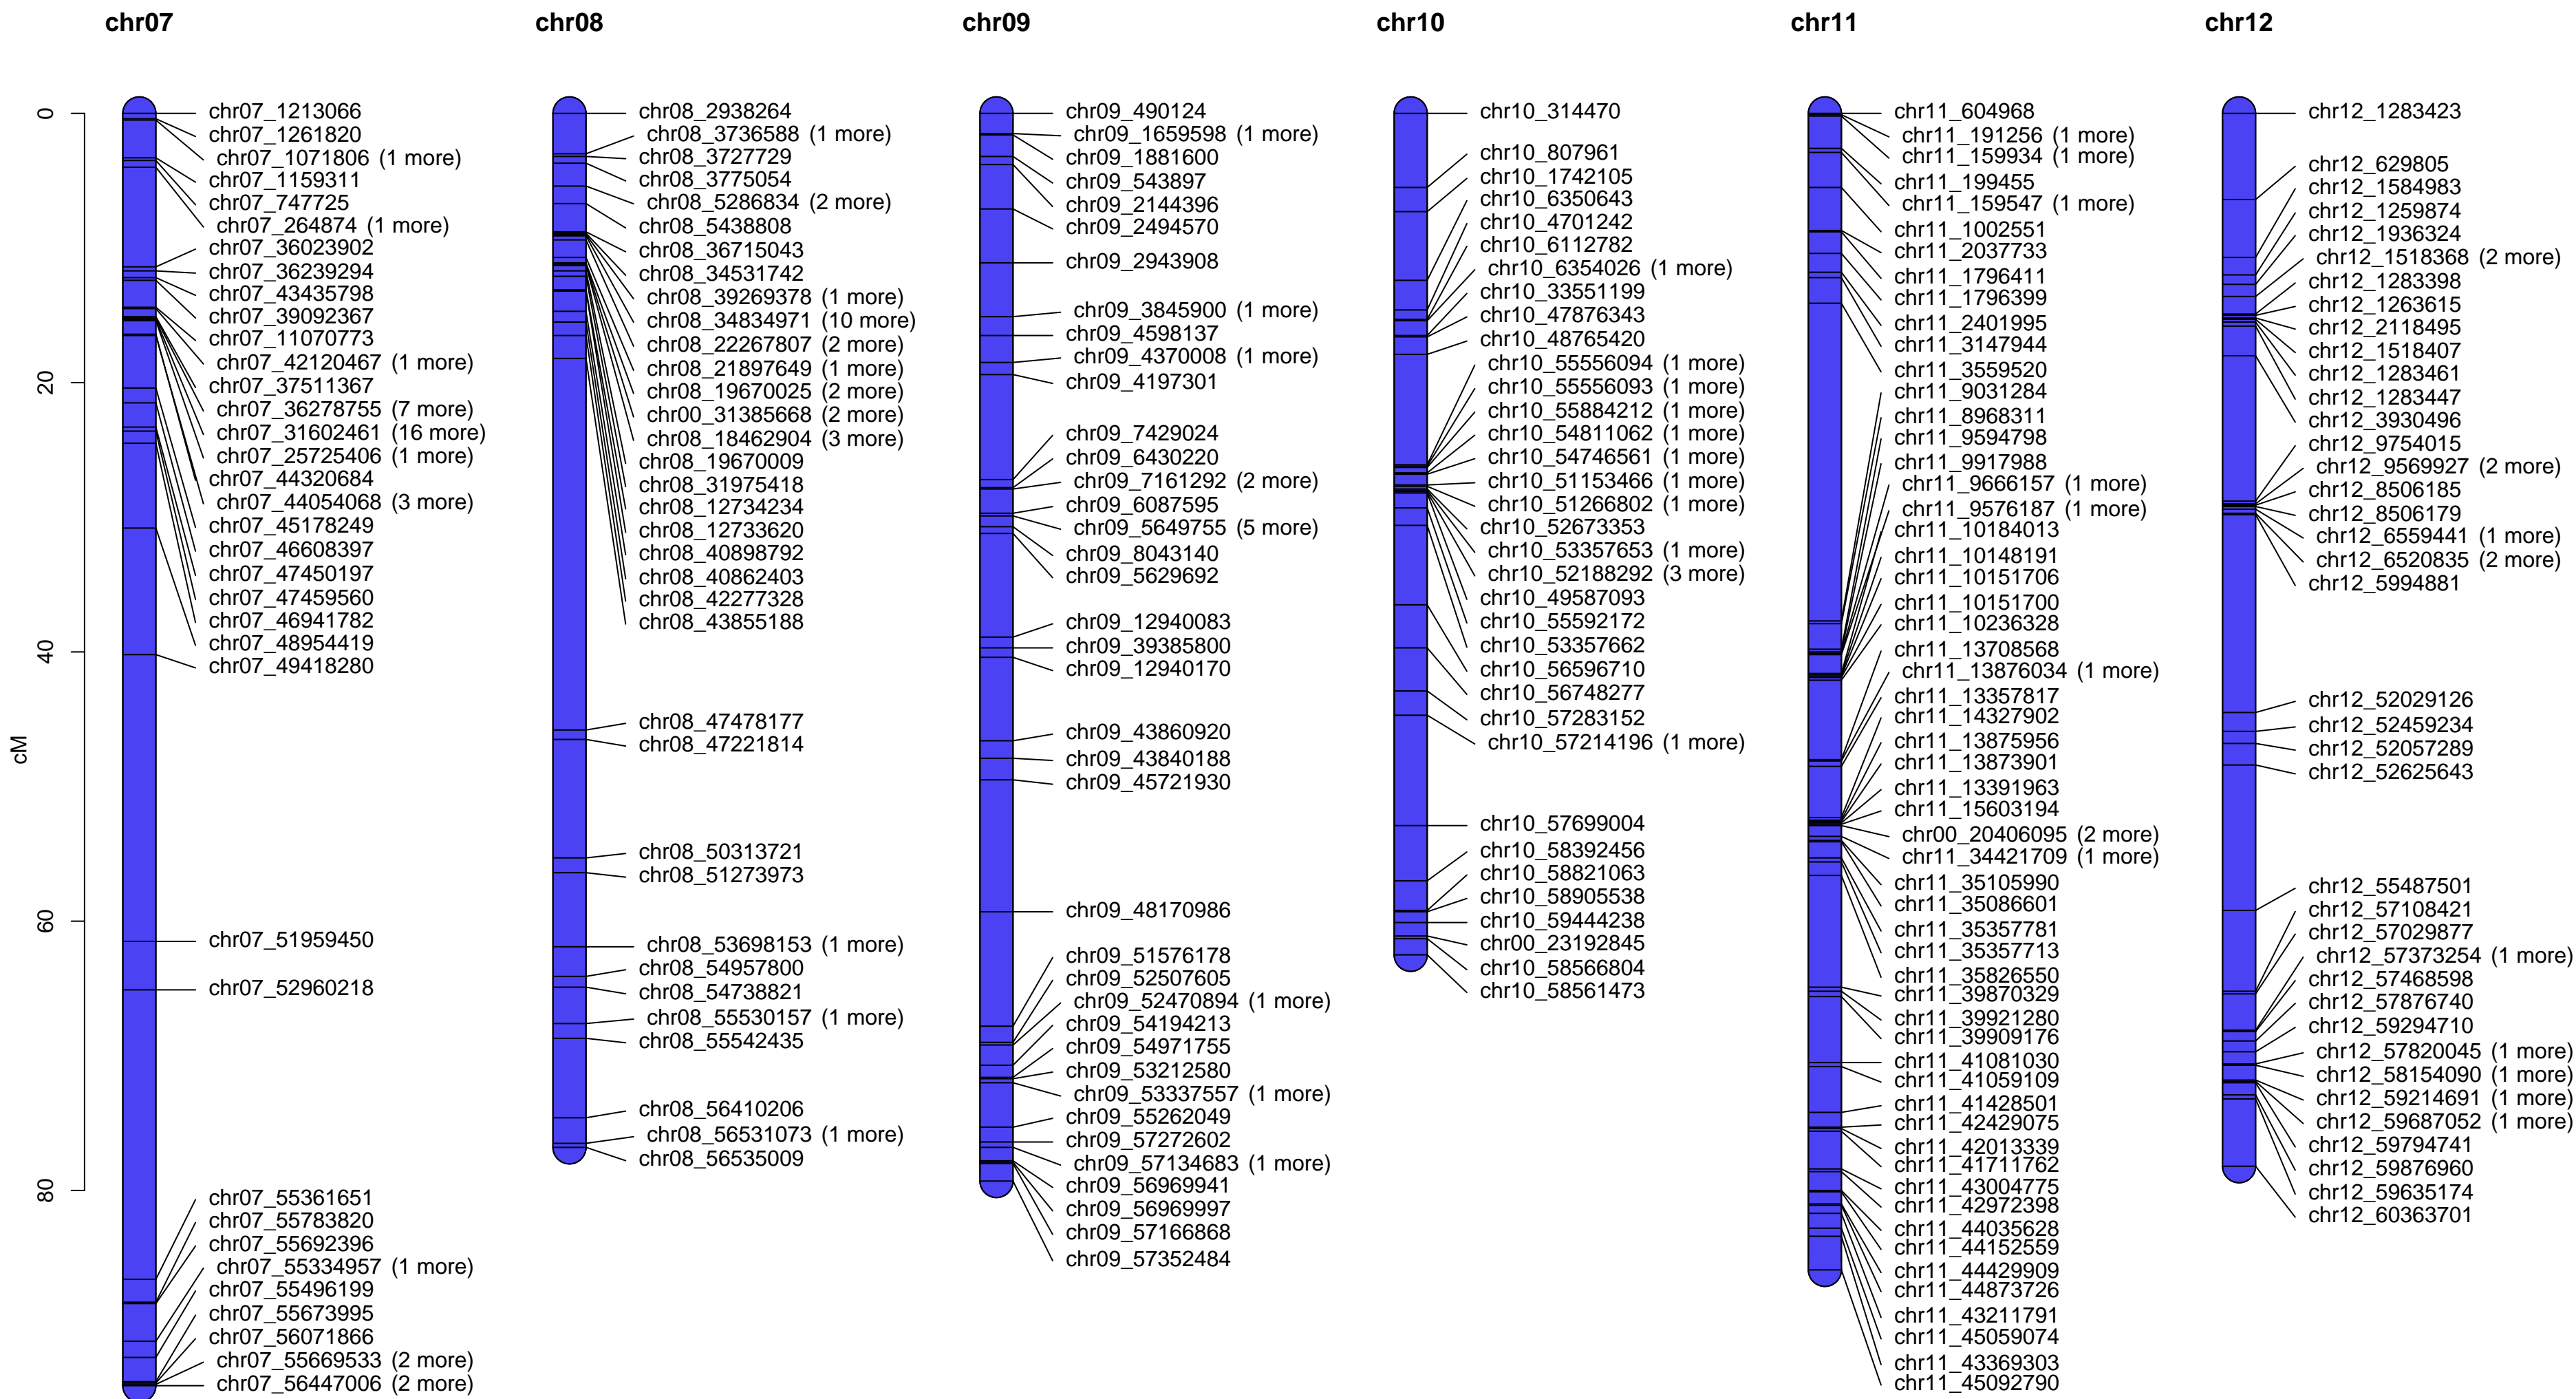

# PAM genetic map

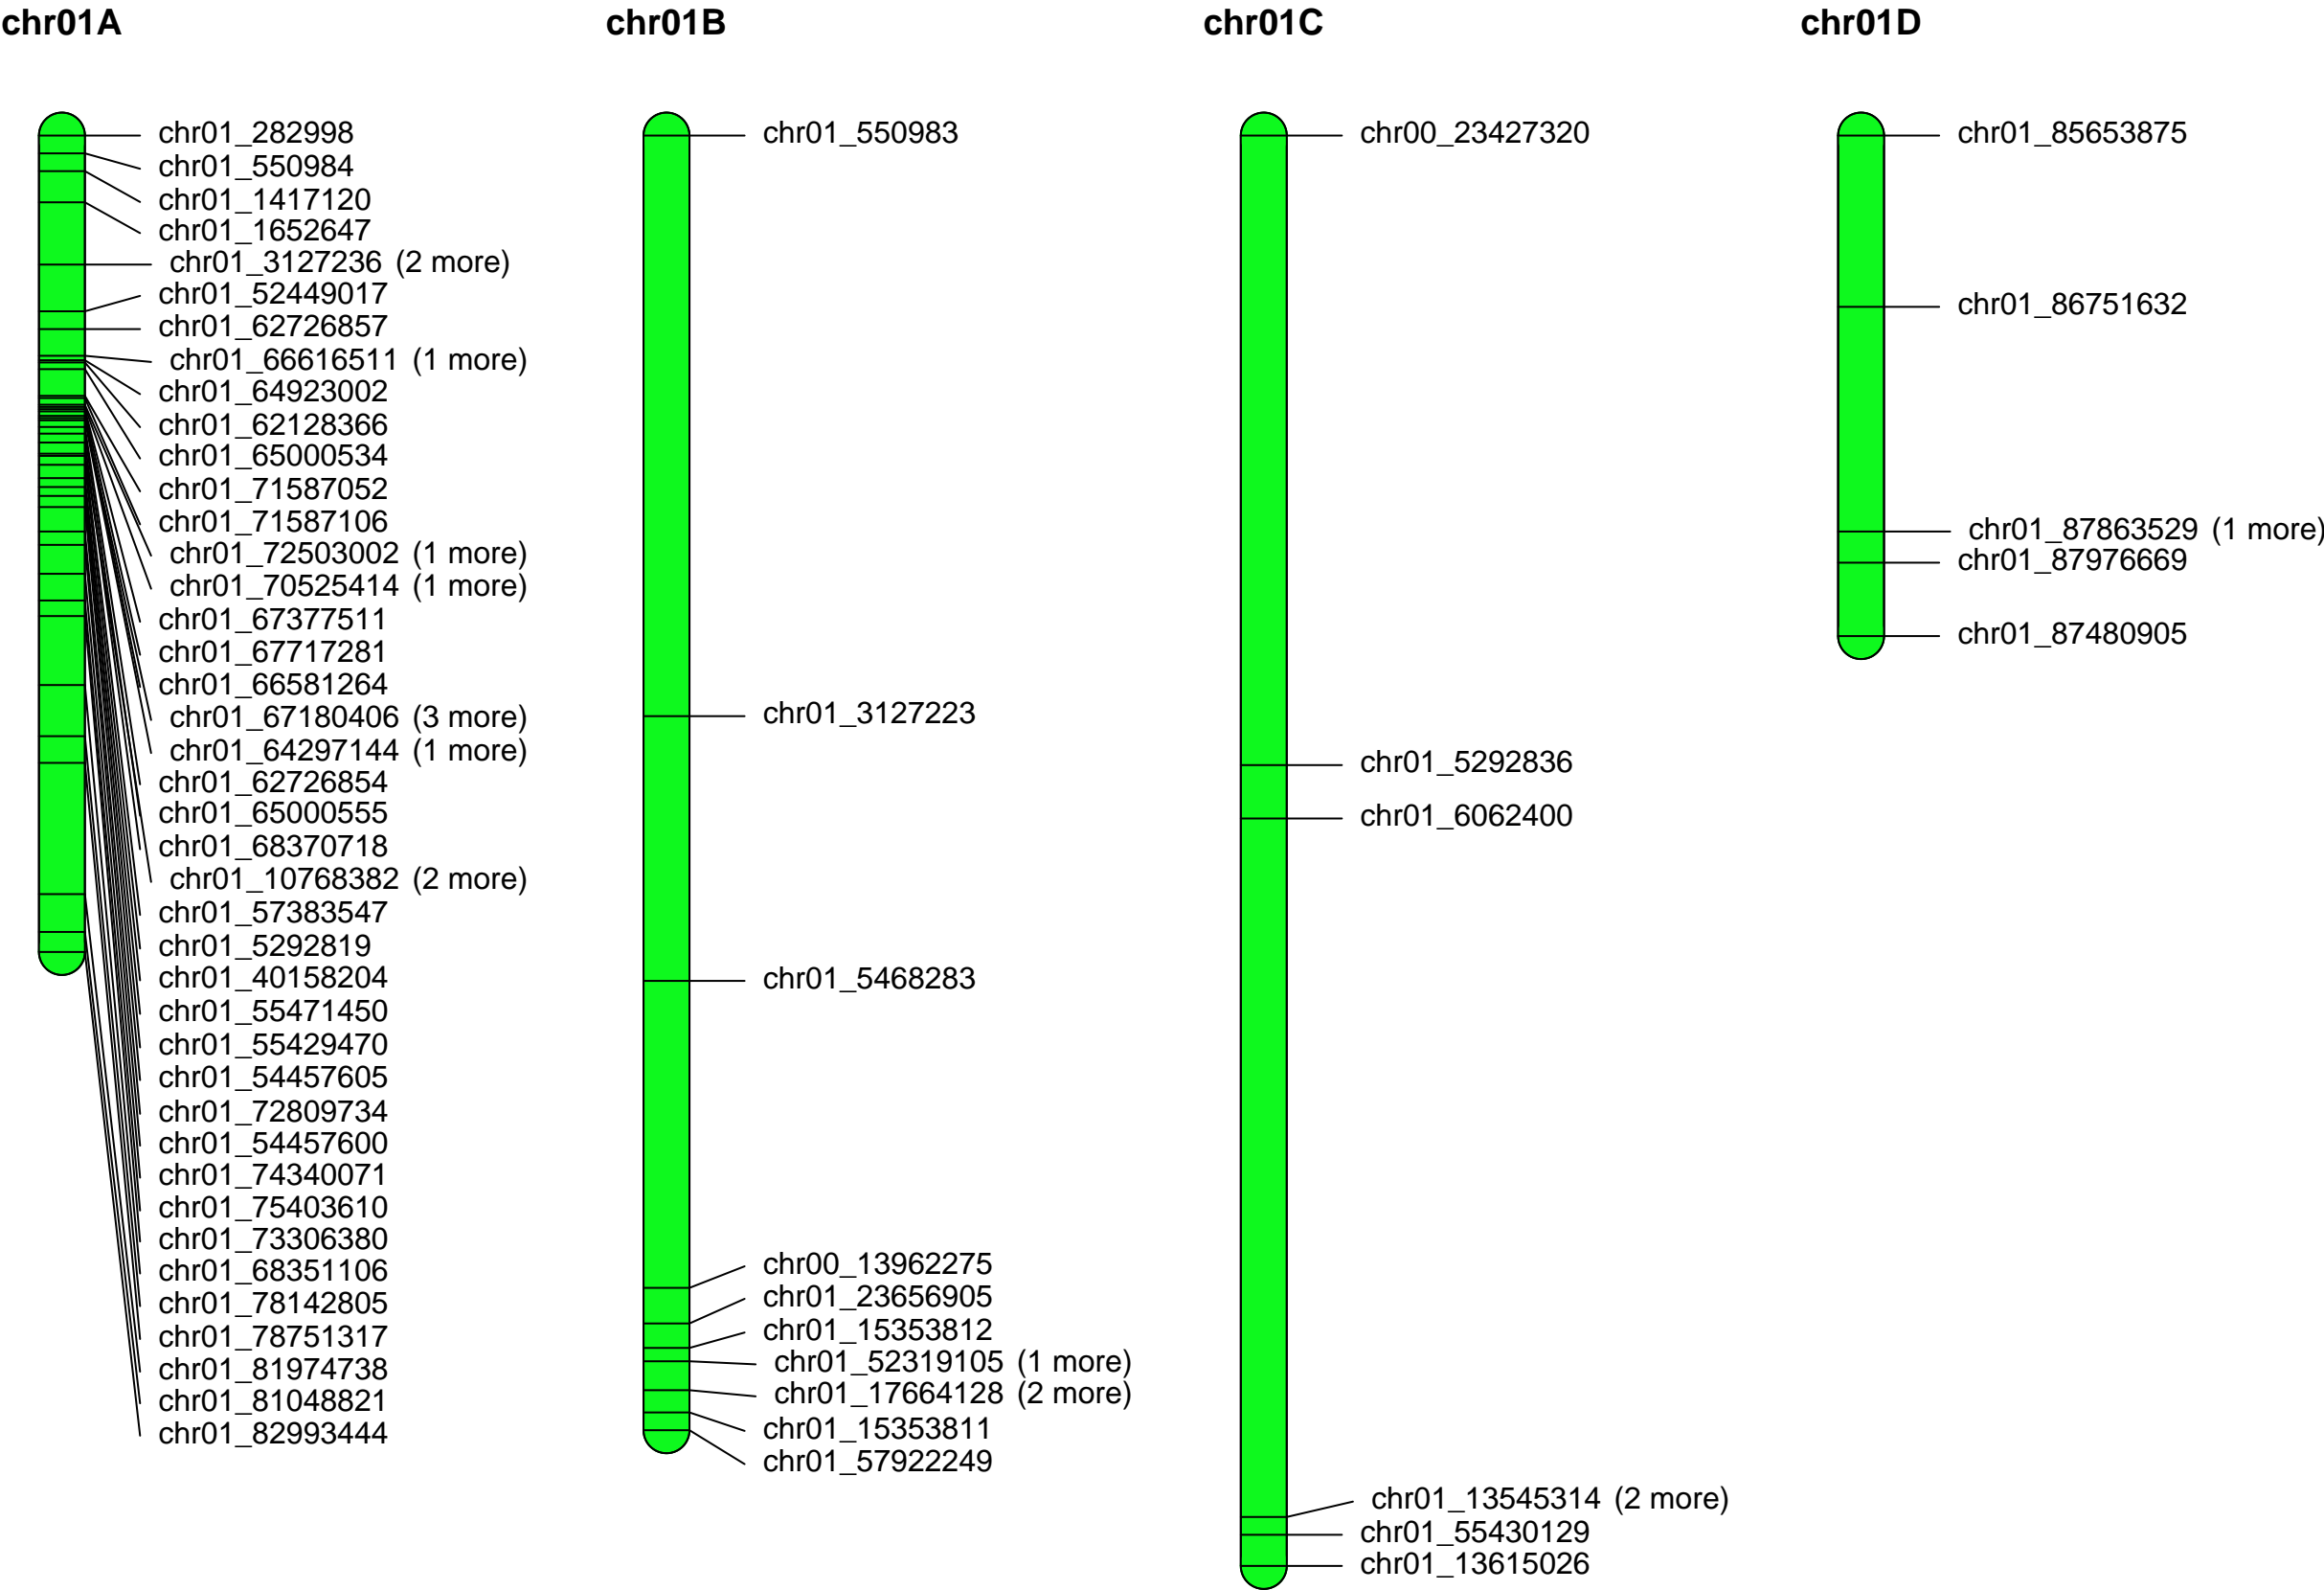

chr02A

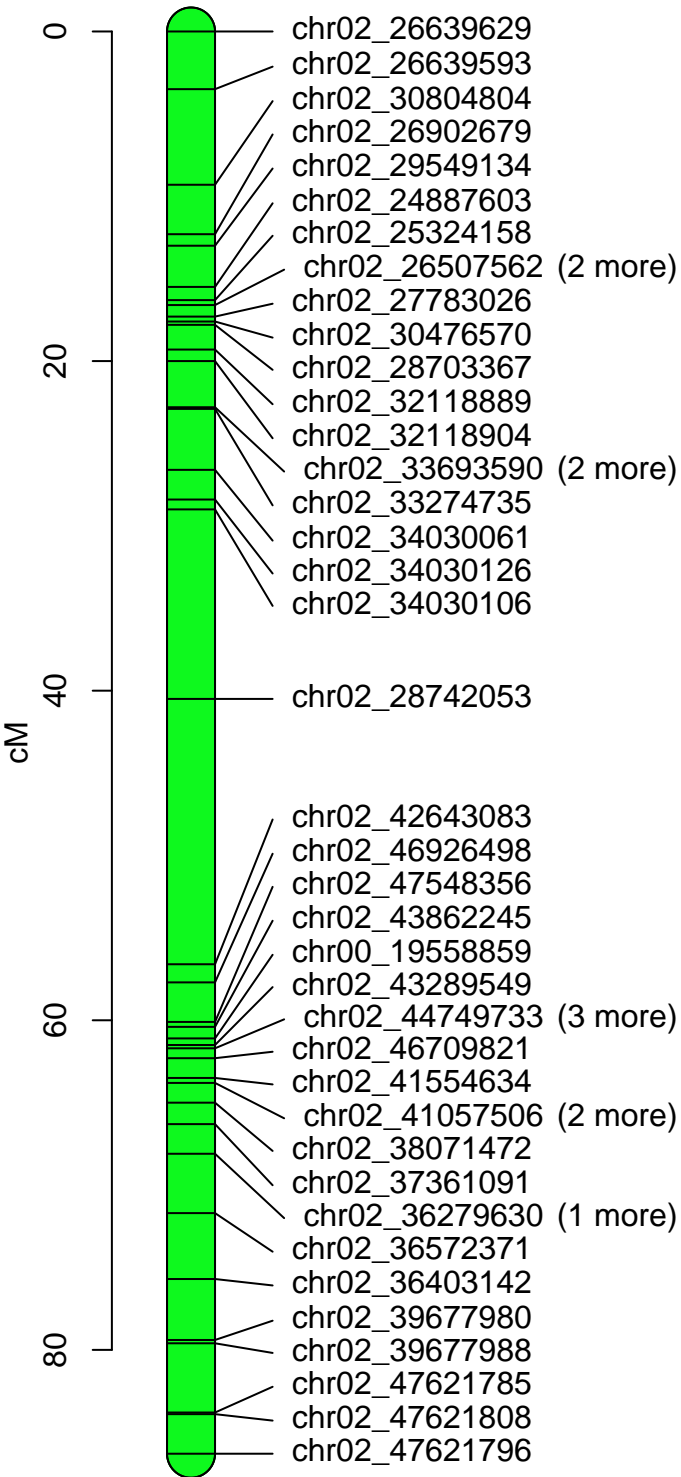

chr02B

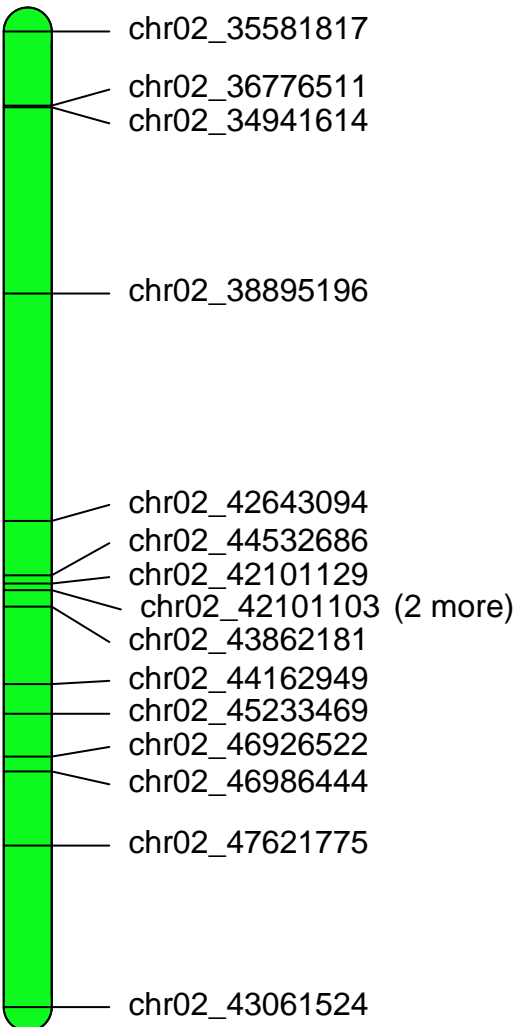

chr02C

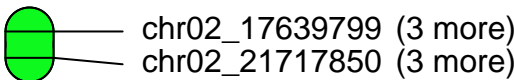

chr02D

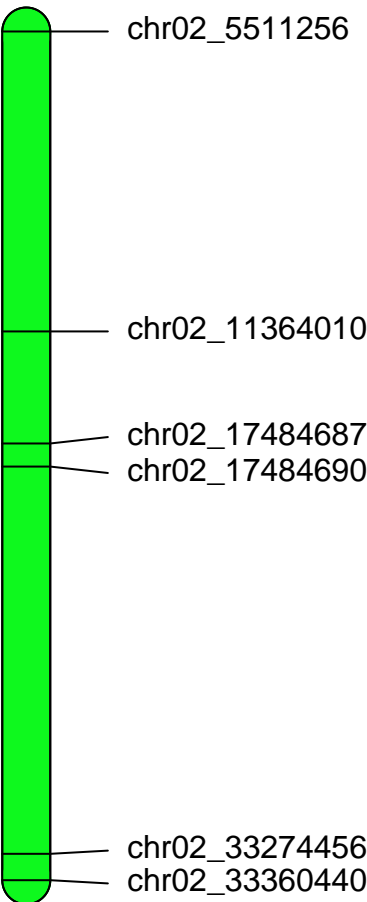

chr02E

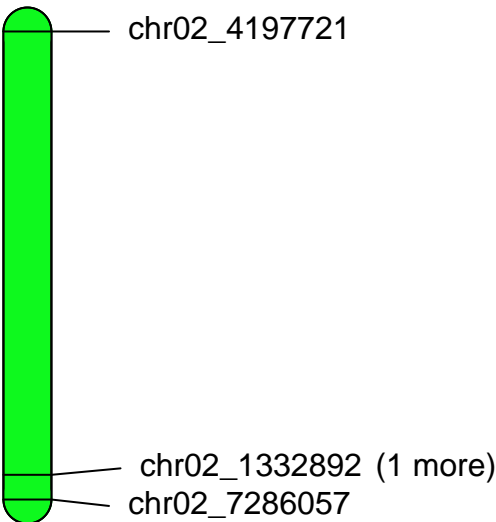

chr03A

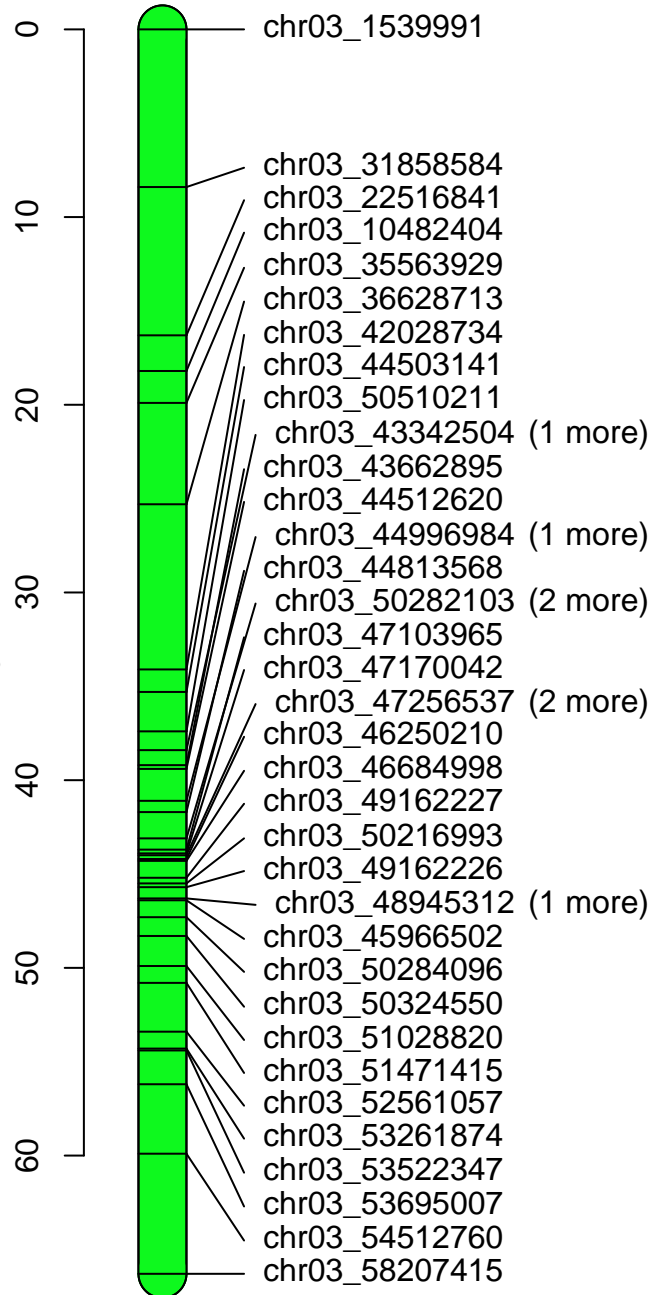

chr03B

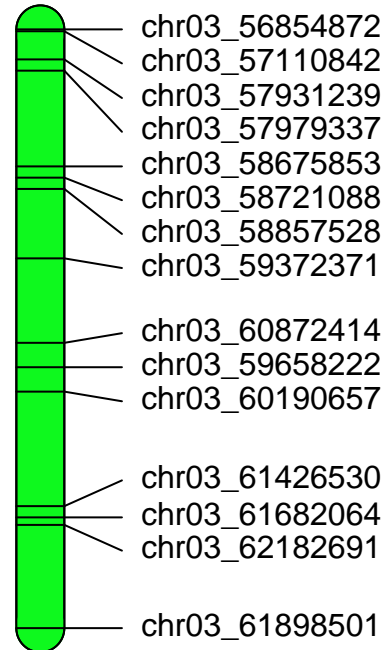

chr03C

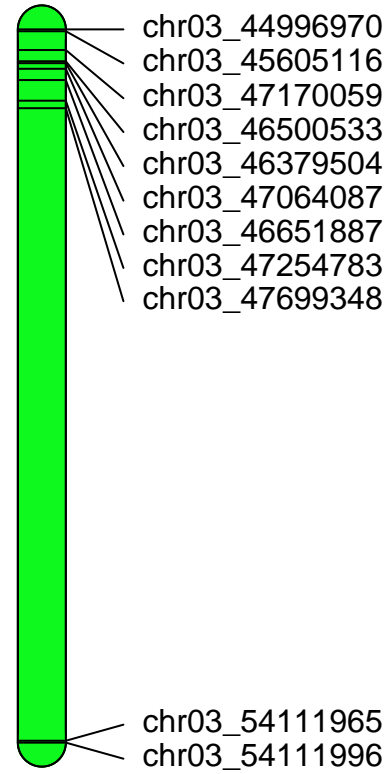

chr03D

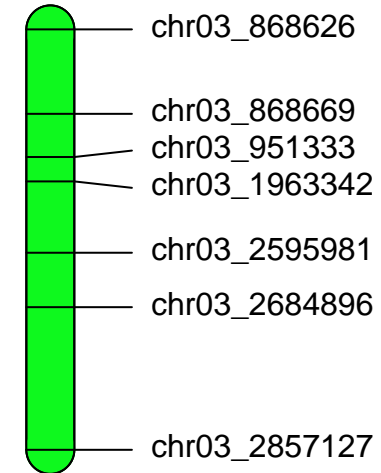

chr03E

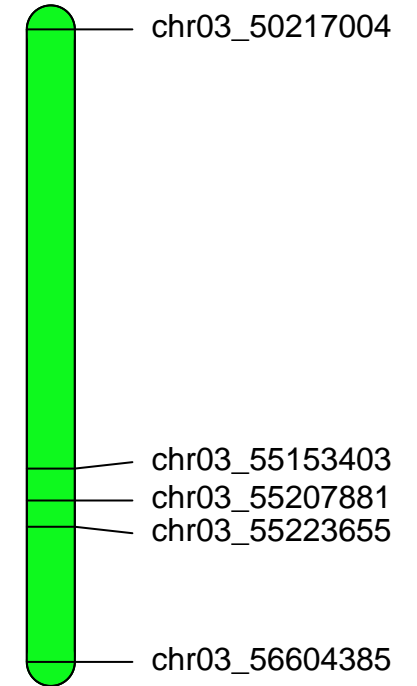



chr04A

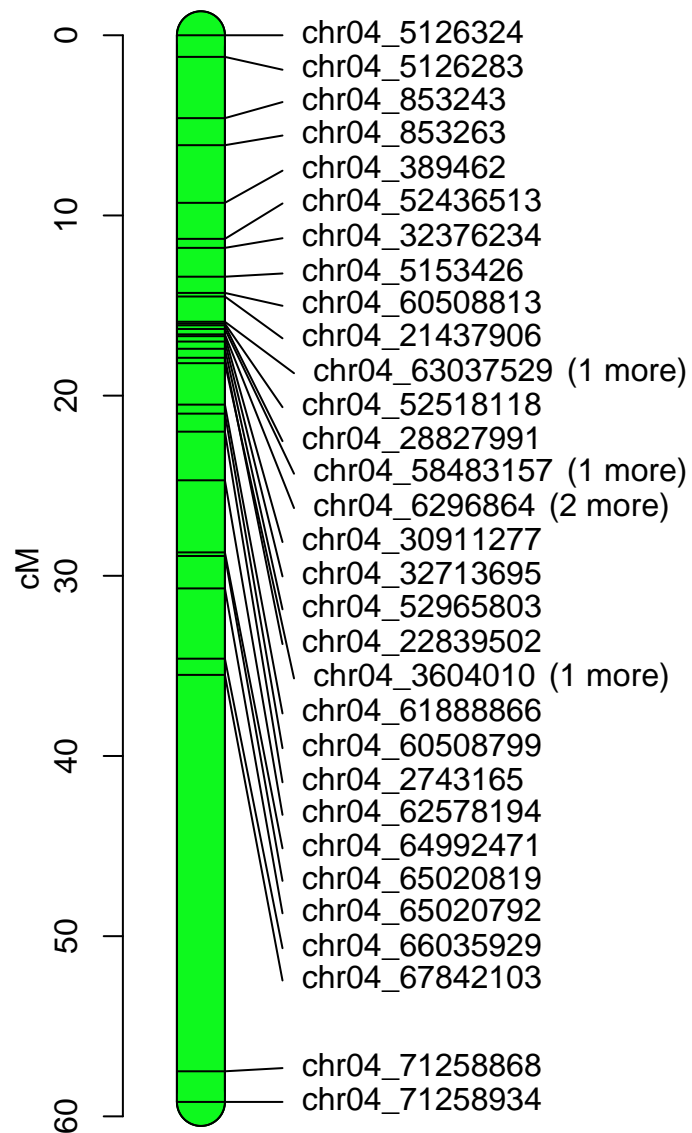

chr04B

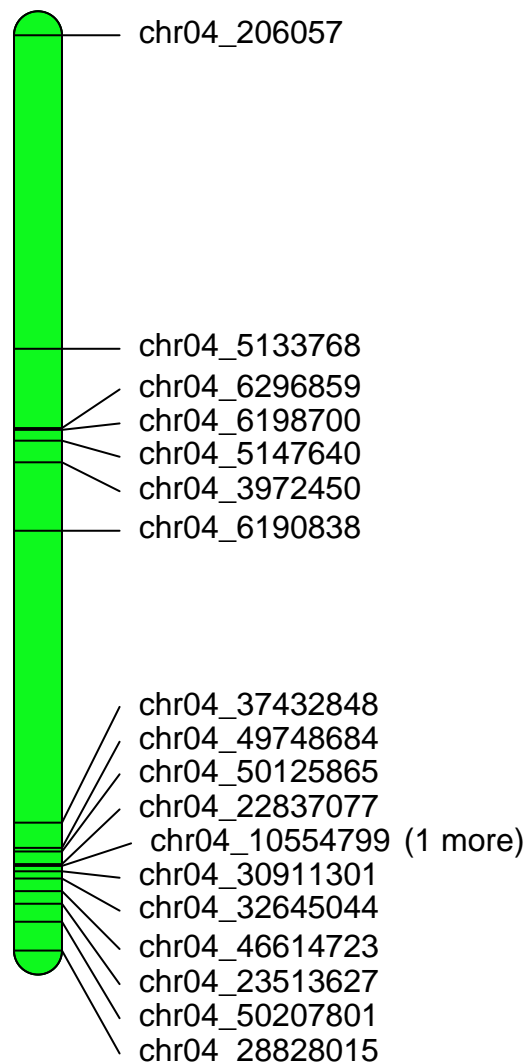

chr04C

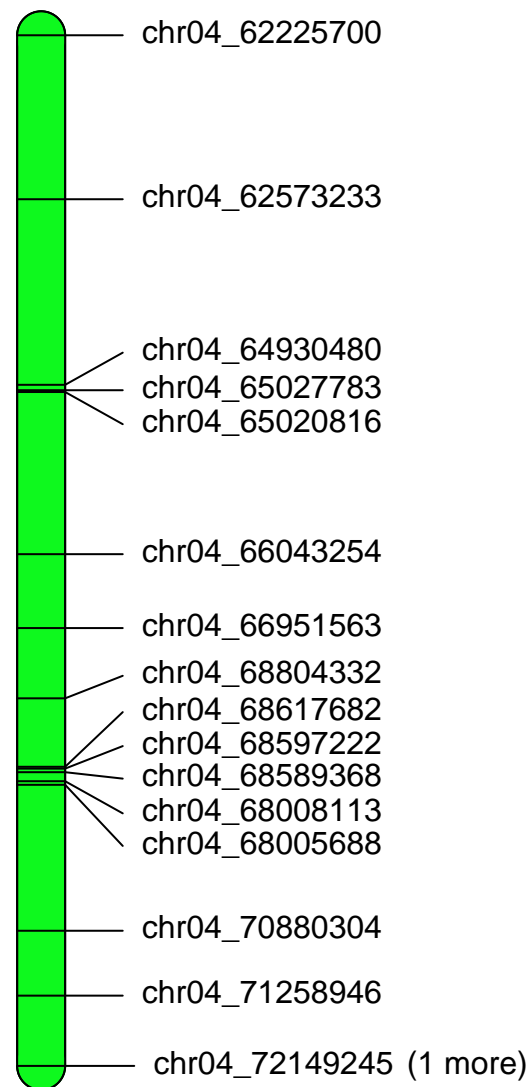

## chr05A

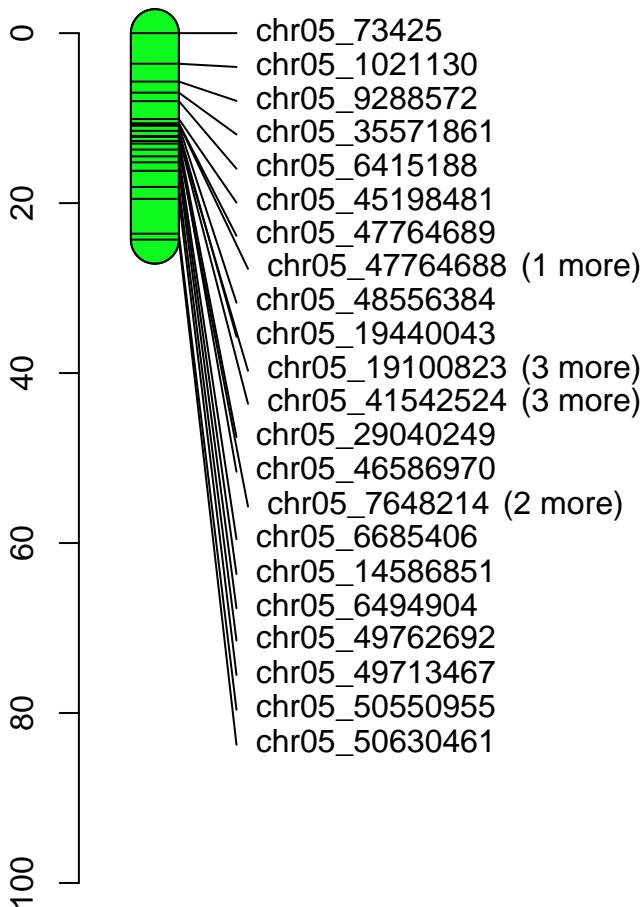

## chr05B

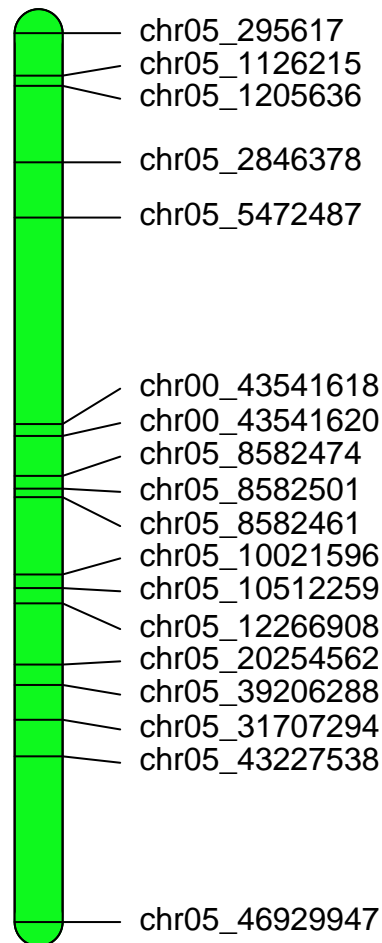



chr06A

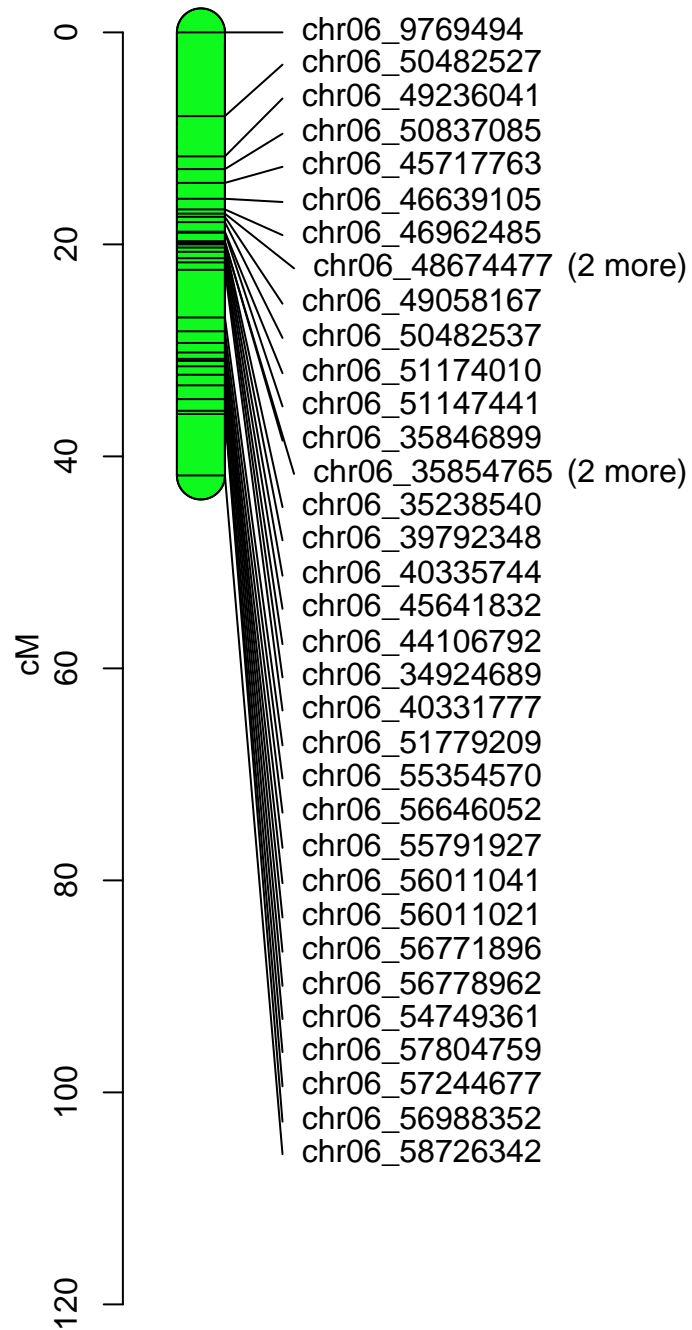

chr06B

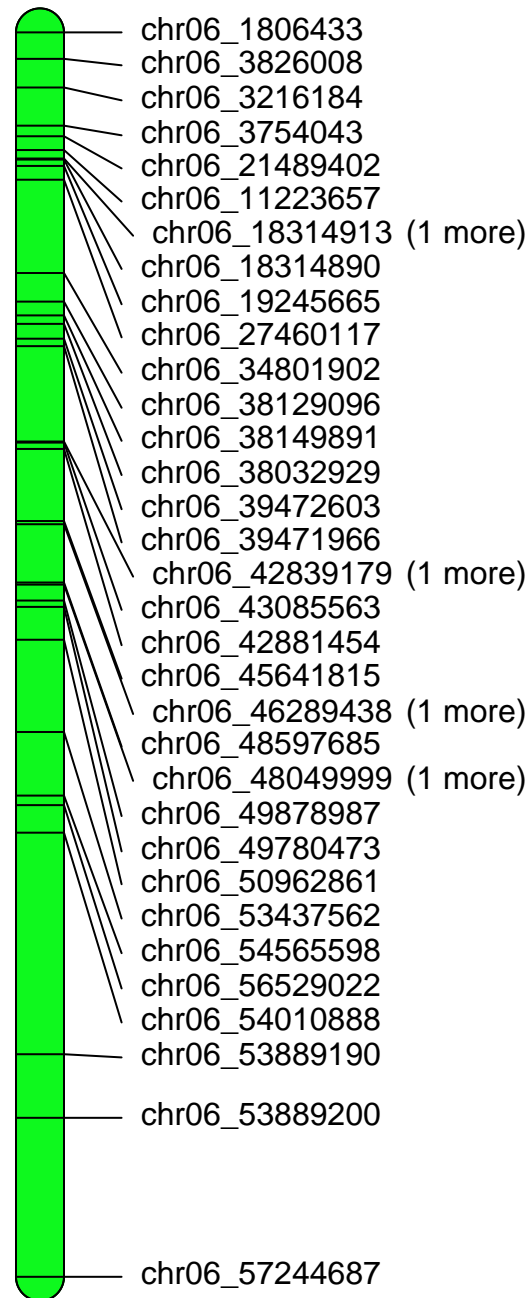

chr06C

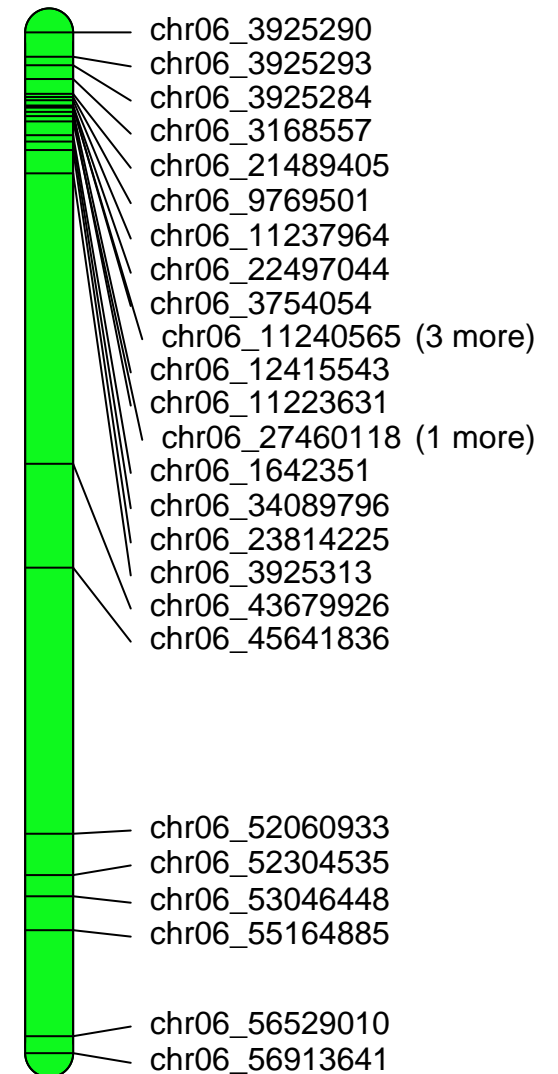

chr07A

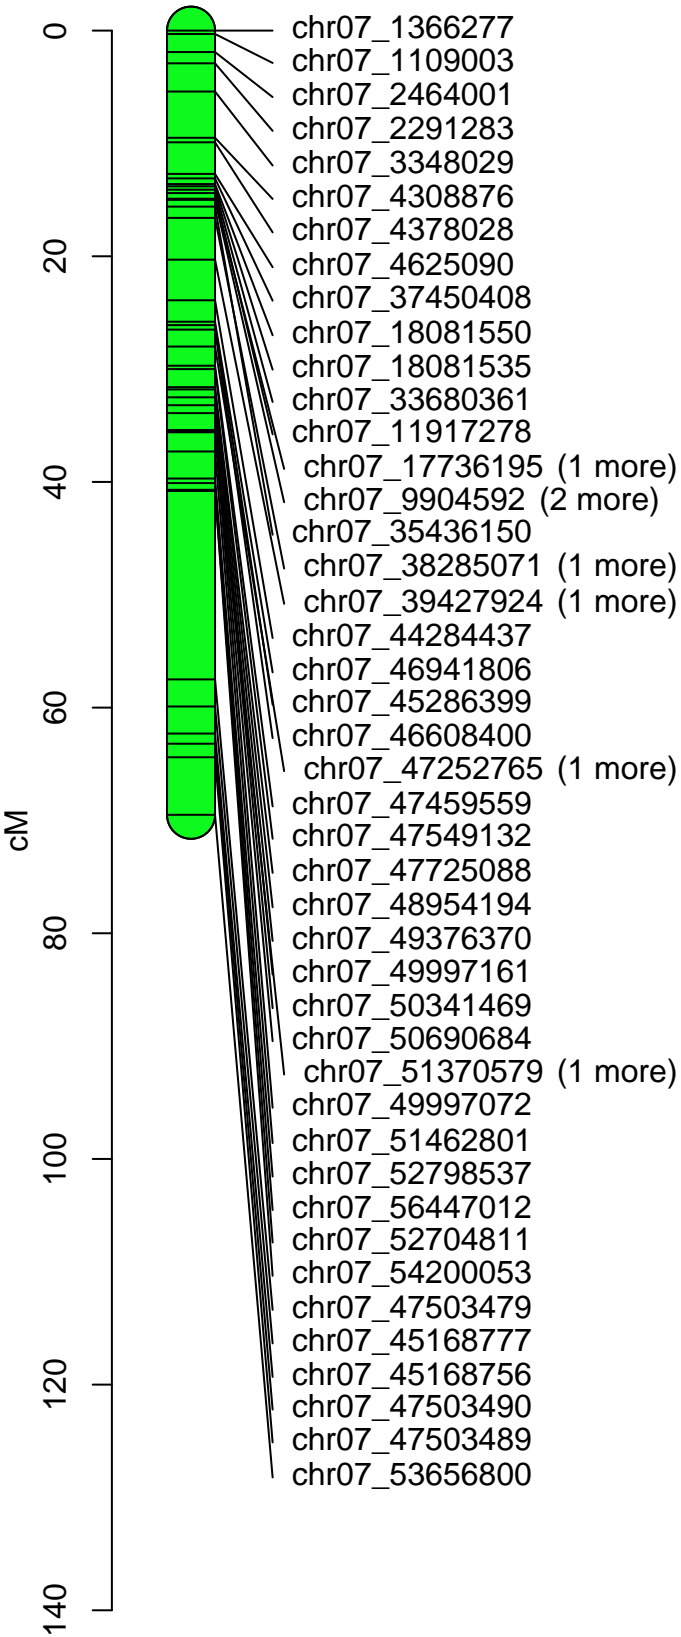

chr07B

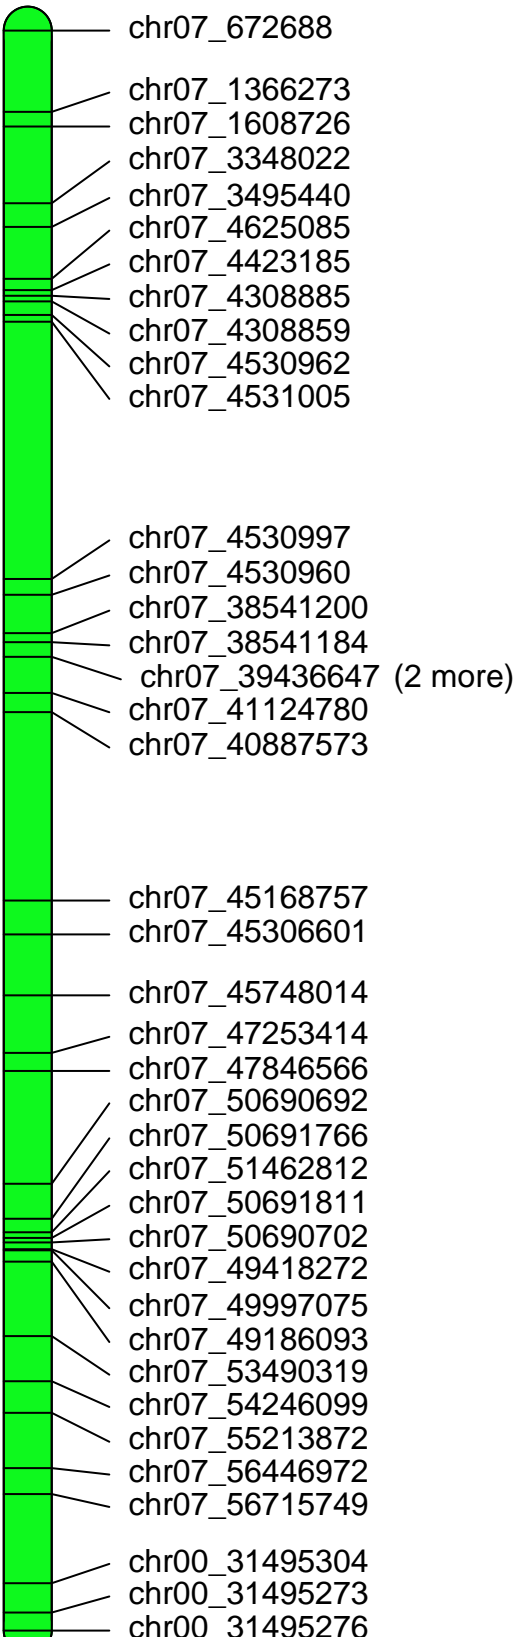

chr07C

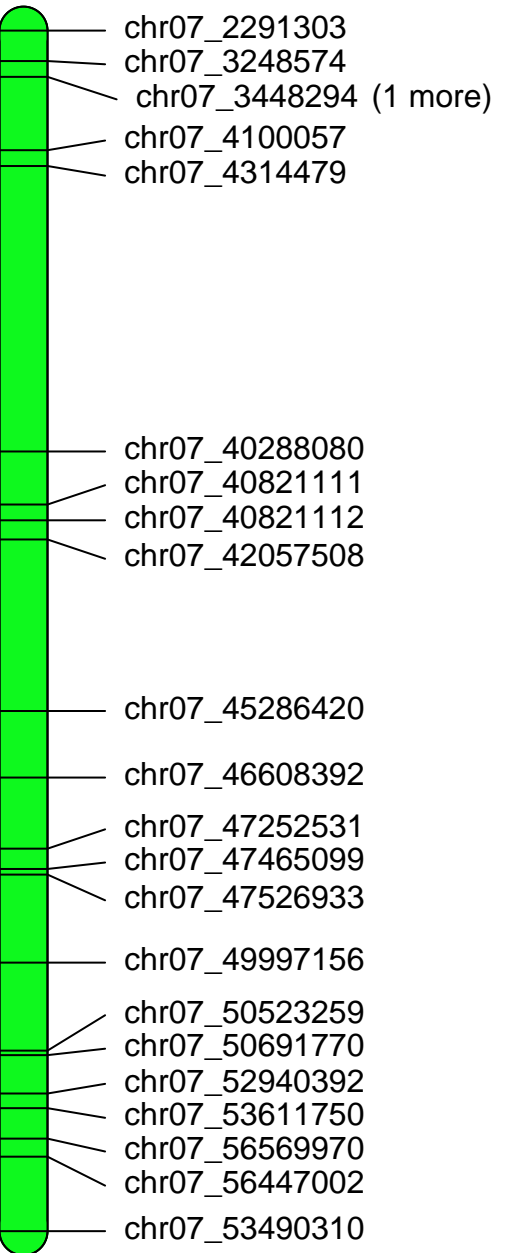

chr07D

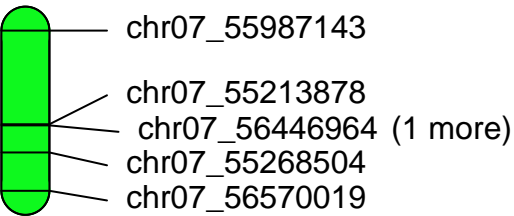

chr07E

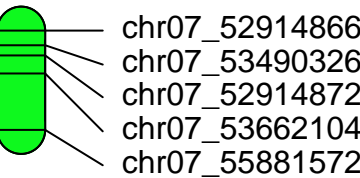



chr08A

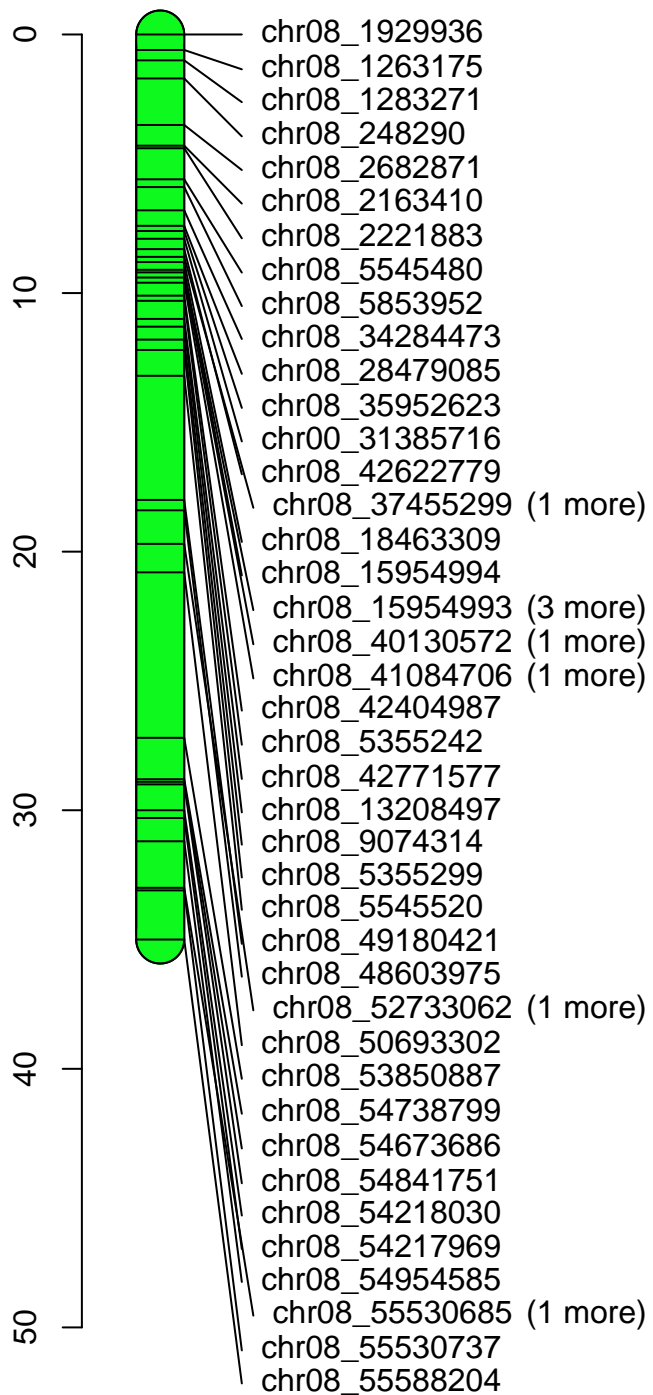

chr08B

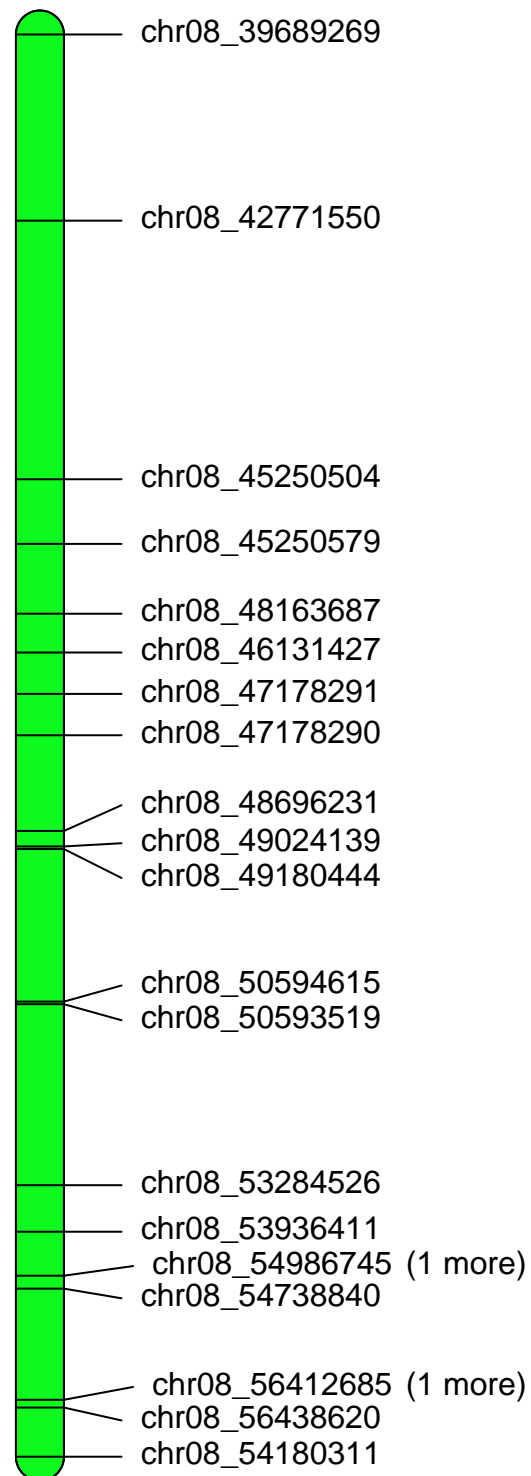

chr08C

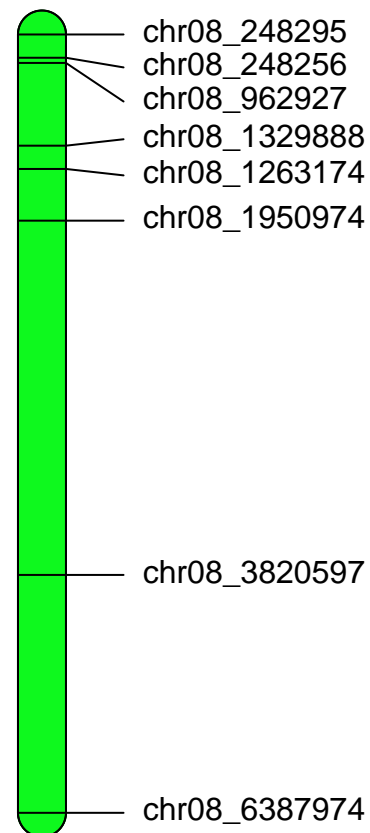

chr08D

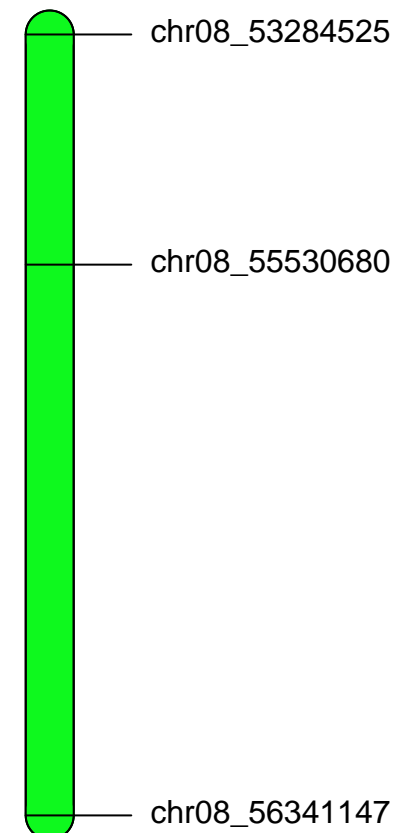

chr09A

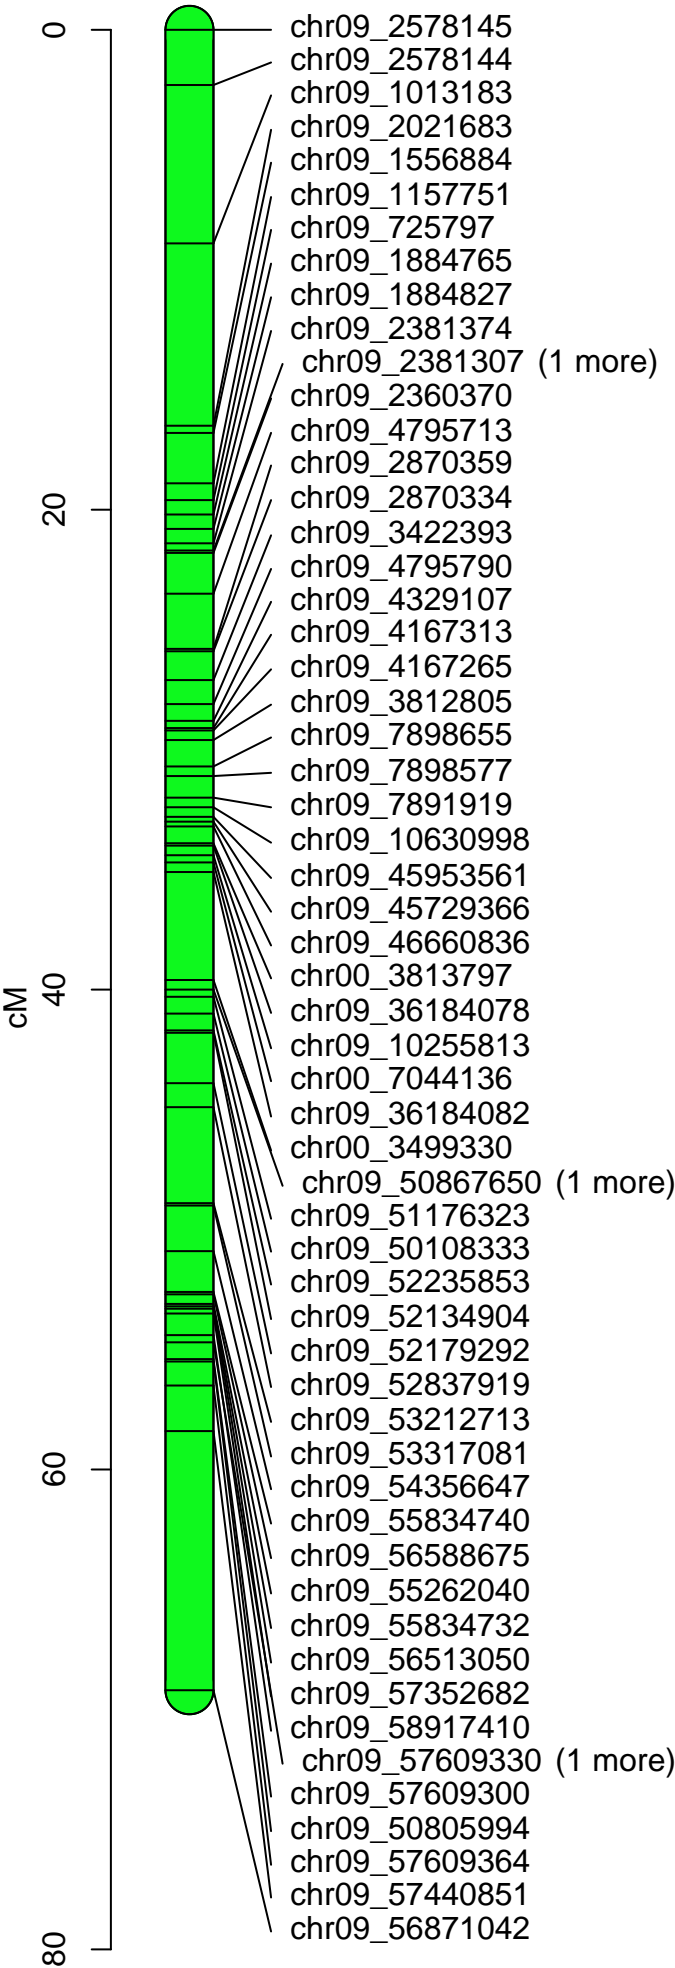

chr09B

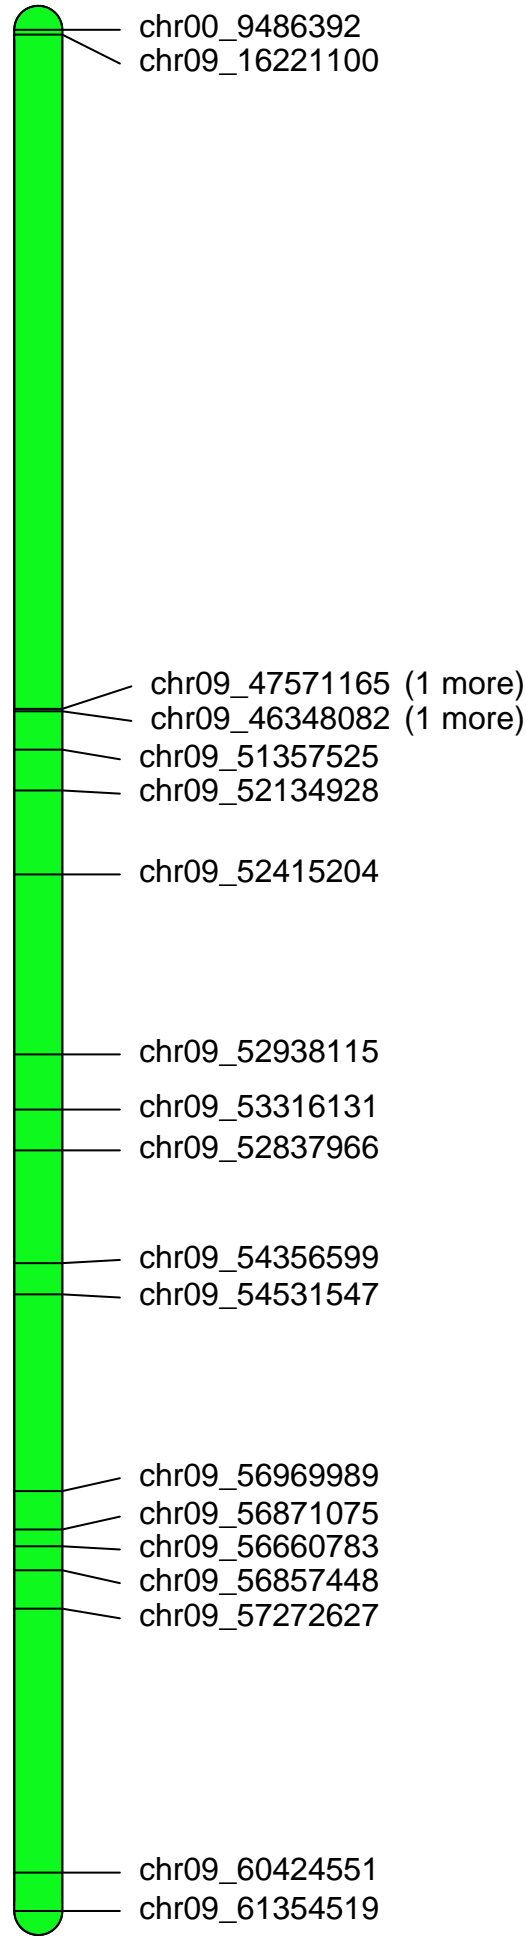

chr09C

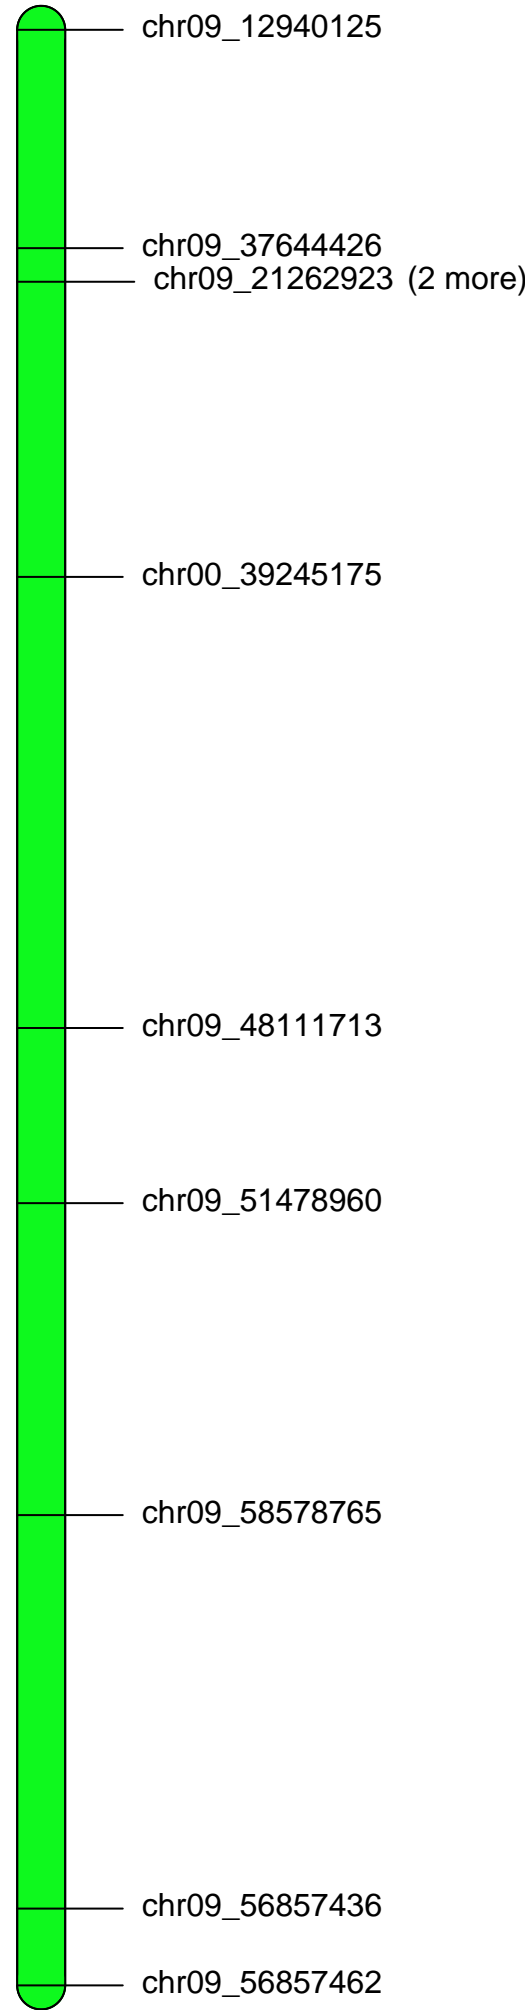

chr09D

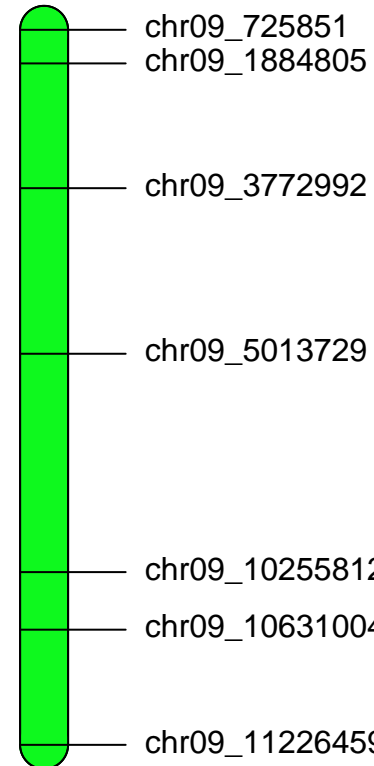



chr10A

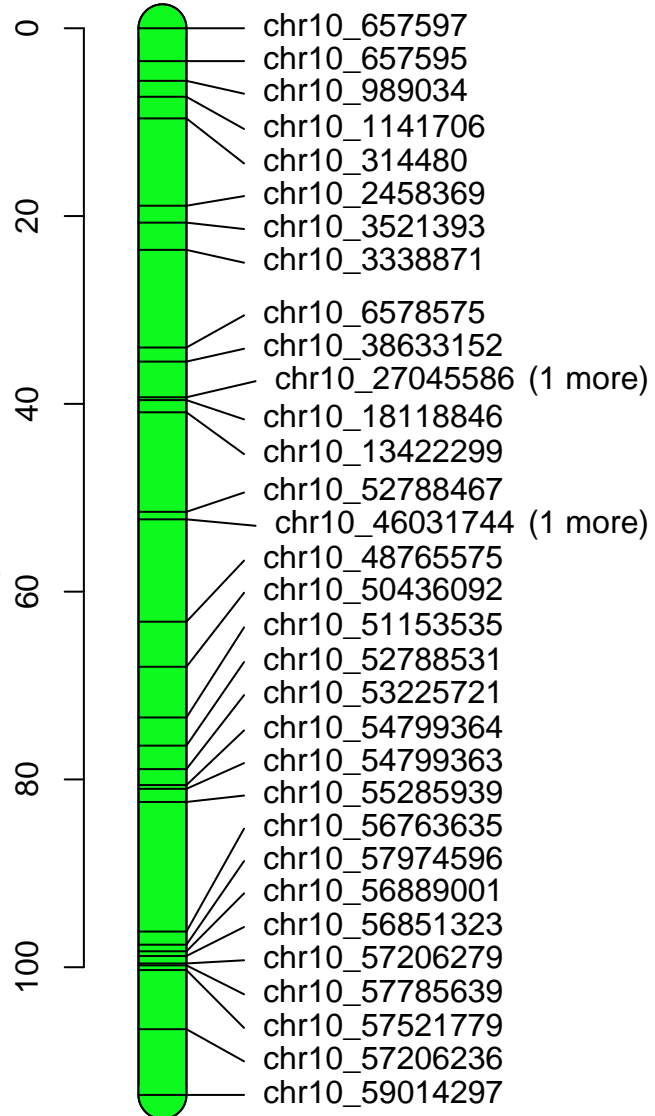

chr10B

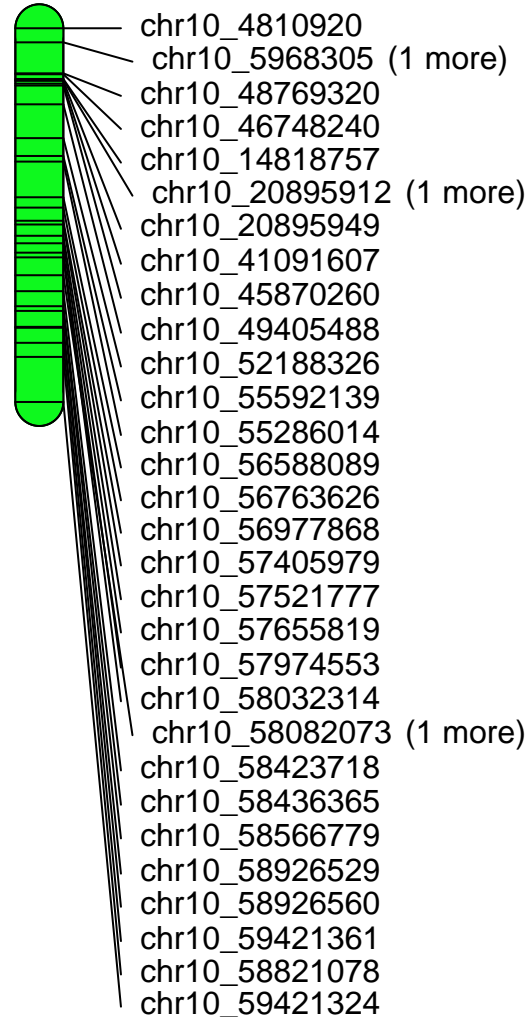

chr10C

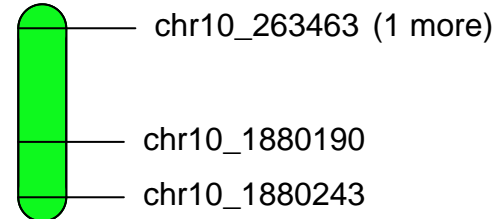

chr10D

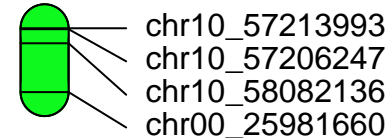

## chr11A

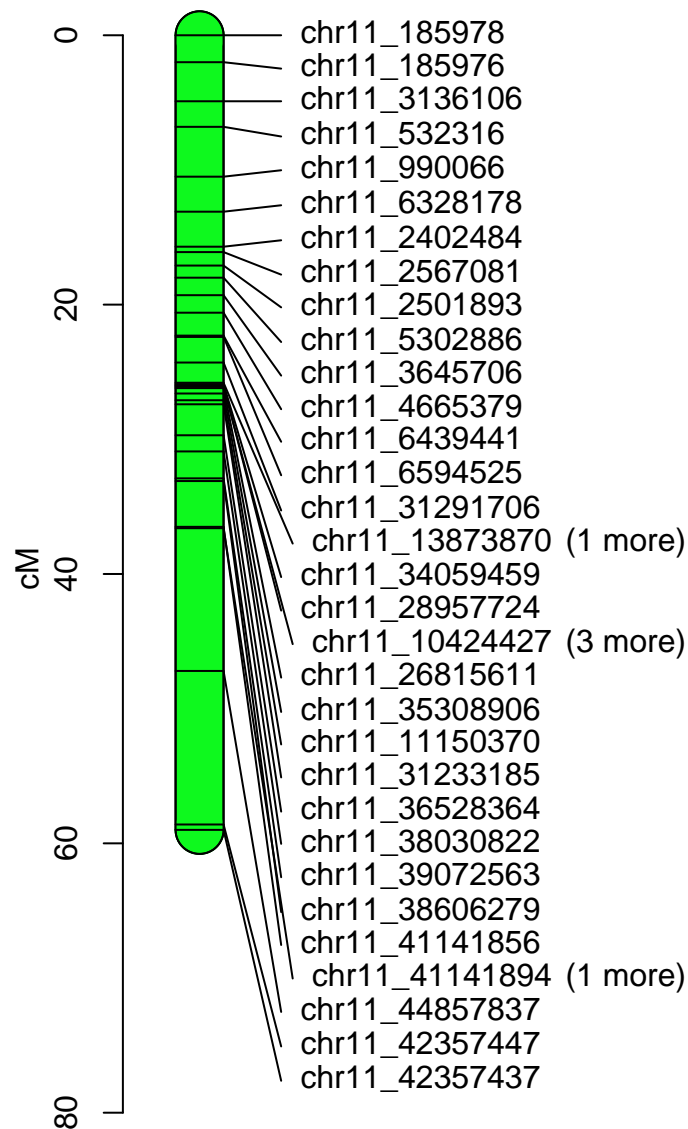

## chr11B

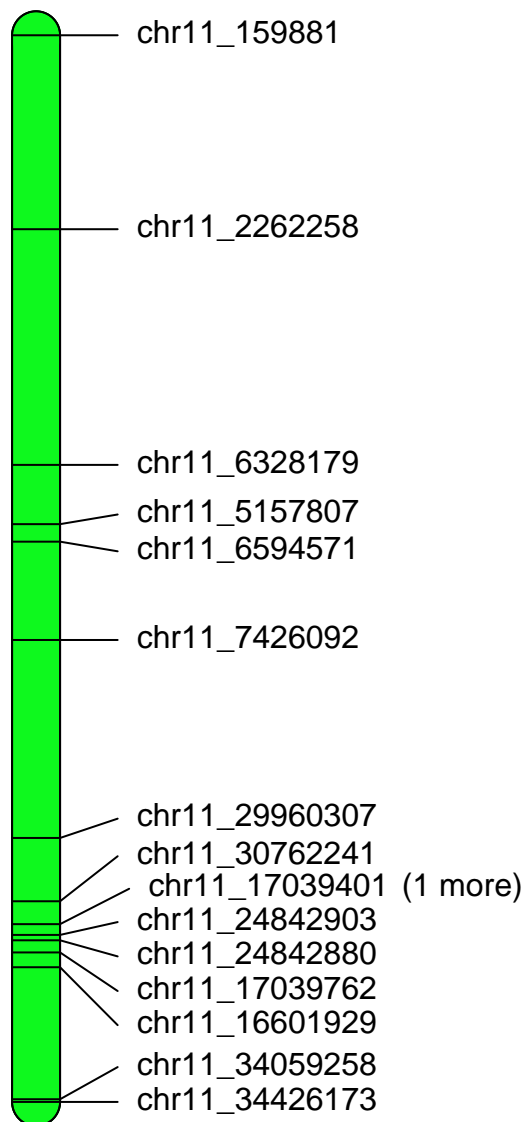



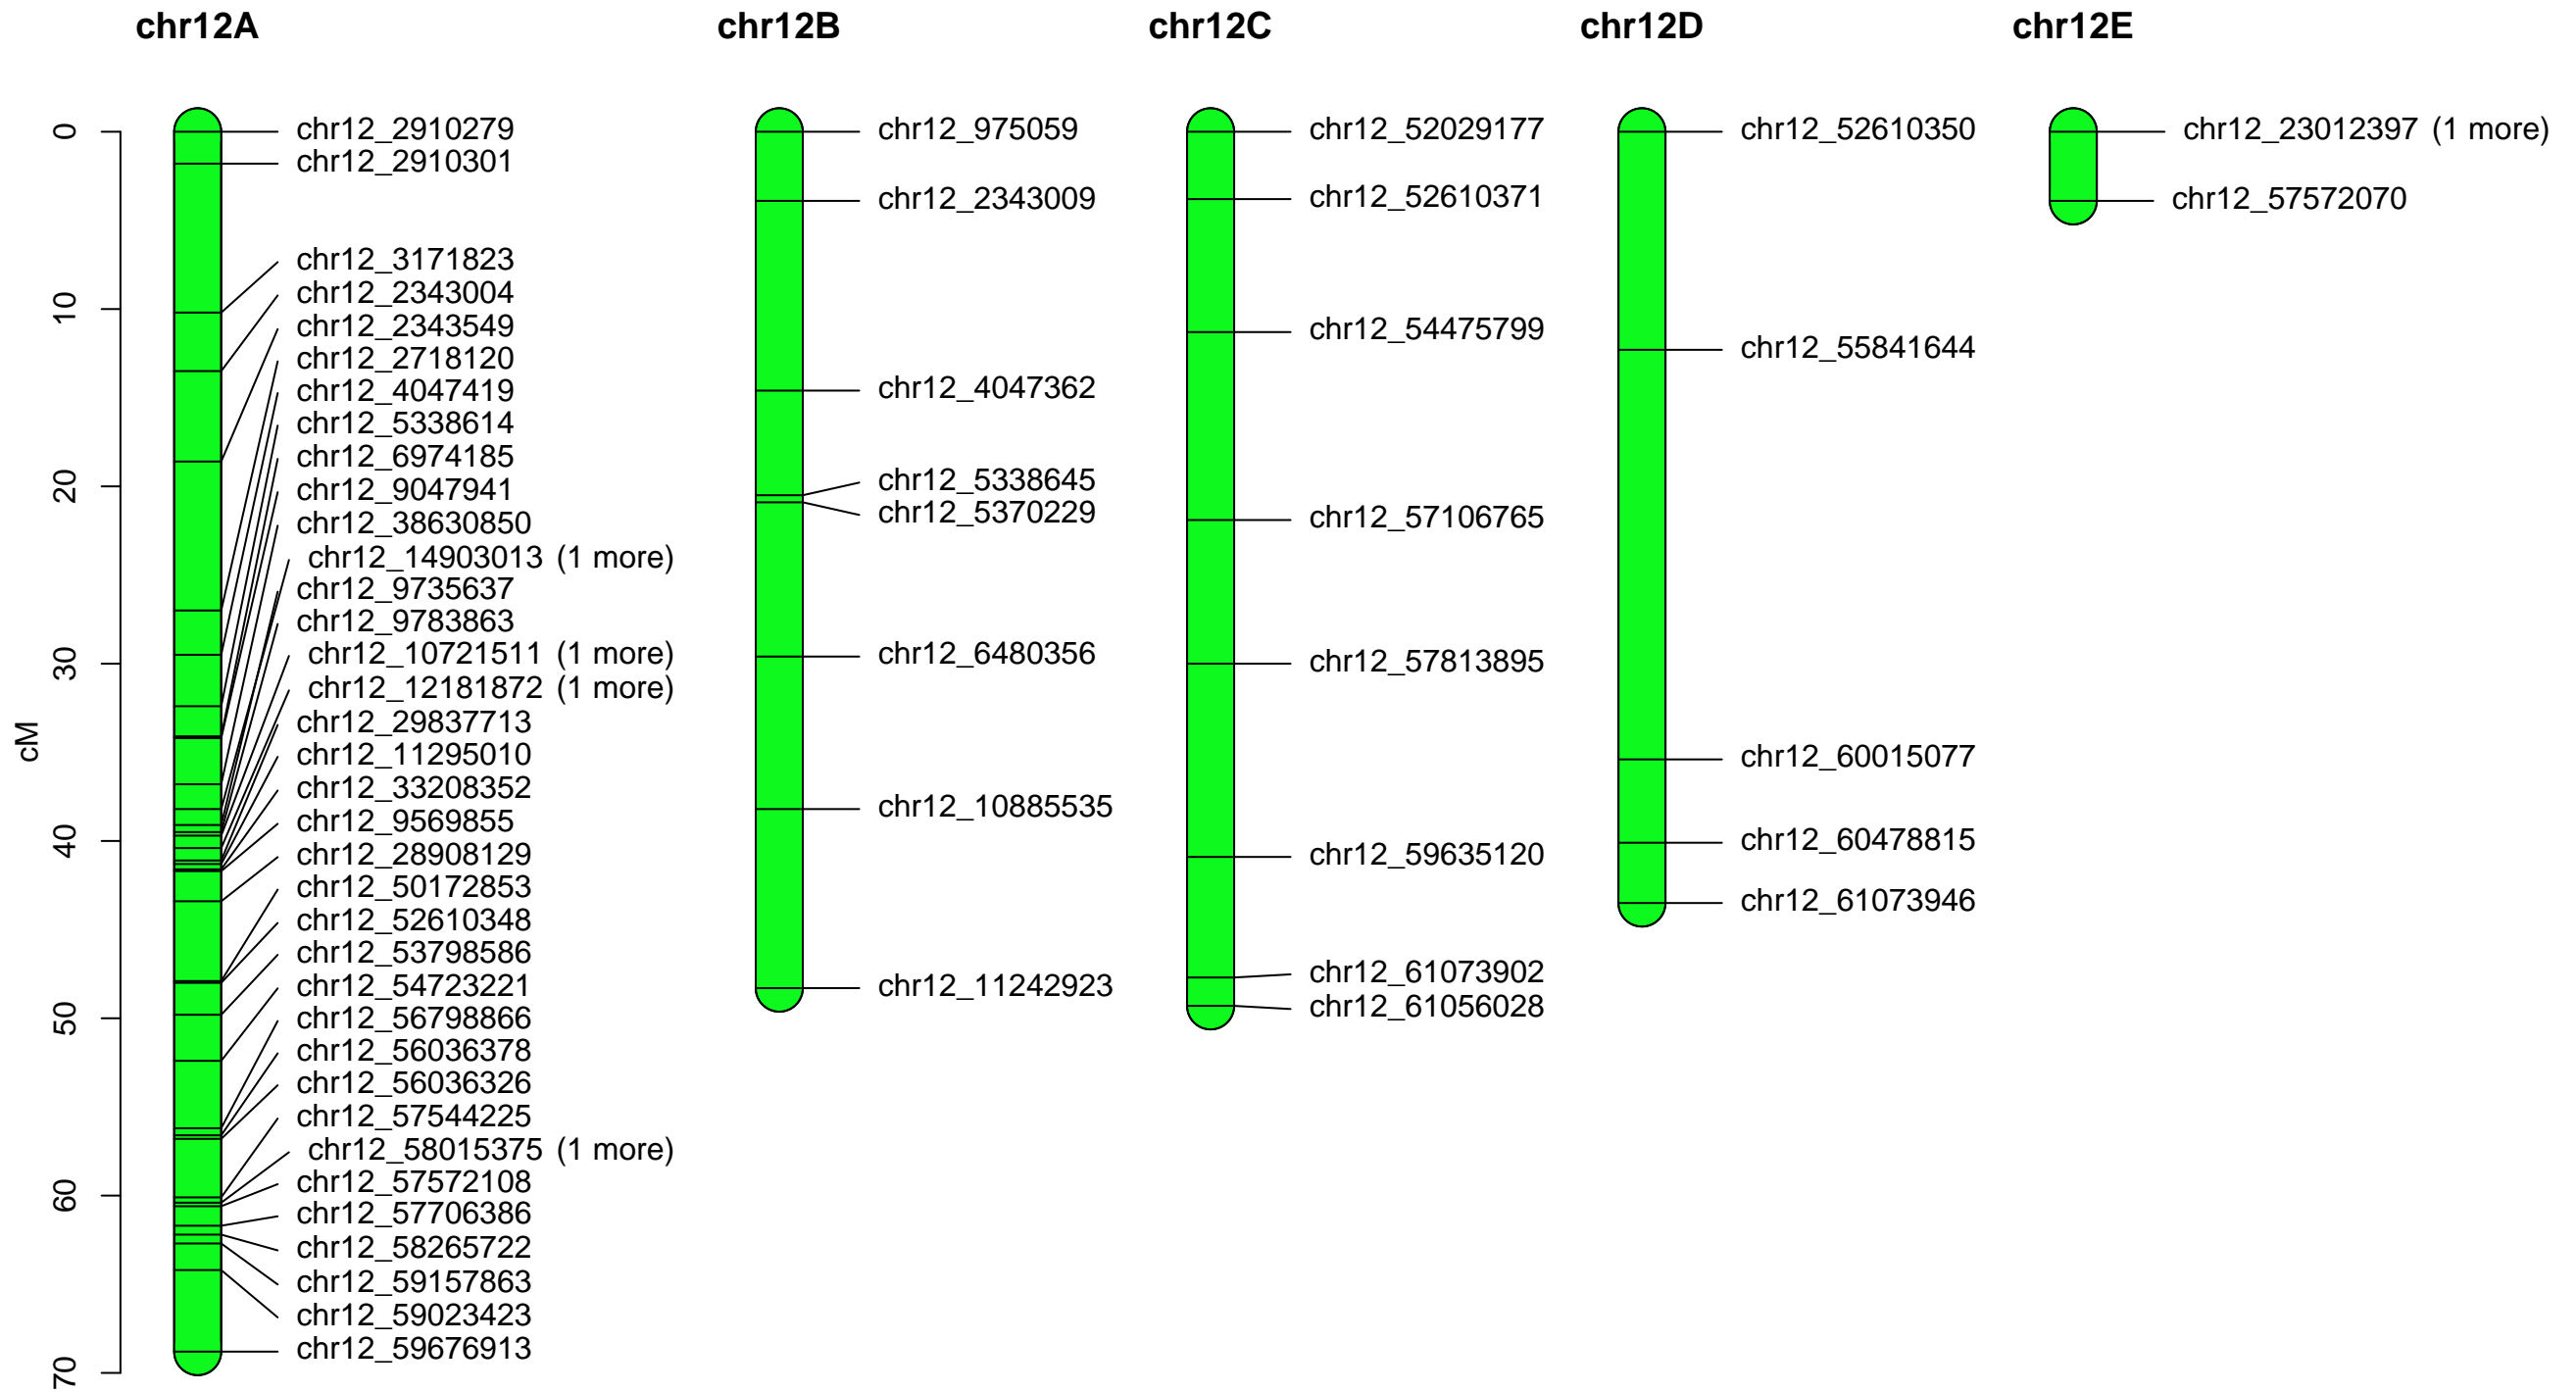

| Map        | LG     | Position (cM) | Locus          | chr00 contig             | PGSC Pseudomolecule Tiling Path |
|------------|--------|---------------|----------------|--------------------------|---------------------------------|
| MCD ALL    | chr01  | 24.237        | chr00_13544987 | chr00:13530242..13971654 | PGSC0003DMB000000464            |
|            | chr02  | 1.339         | chr00_21611244 | chr00:21579816..21728535 | PGSC0003DMB000000756            |
|            | chr03  | 23.829        | chr00_40502850 | chr00:40502447..40504311 | PGSC0003DMB0000002378           |
|            | chr03  | 23.986        | chr00_8000147  | chr00:7515800..8485525   | PGSC0003DMB0000000254           |
|            | chr04  | 0             | chr00_12567719 | chr00:12173931..12667864 | PGSC0003DMB0000000431           |
|            | chr04  | 5.365         | chr00_12407838 | chr00:12173931..12667864 | PGSC0003DMB0000000431           |
|            | chr04  | 59.086        | chr00_38233239 | chr00:38228241..38233666 | PGSC0003DMB0000001643           |
|            | chr08  | 36.763        | chr00_31385668 | chr00:31364510..31394384 | PGSC0003DMB0000001091           |
|            | chr10  | 56.754        | chr00_23192845 | chr00:23101765..23217759 | PGSC0003DMB0000000798           |
|            | chr11  | 39.652        | chr00_20406095 | chr00:20257527..20437853 | PGSC0003DMB0000000715           |
| MCD MALE   | chr01  | 19.942        | chr00_28505932 | chr00:28466967..28514885 | PGSC0003DMB0000000979           |
|            | chr02  | 0.782         | chr00_21611244 | chr00:21579816..21728535 | PGSC0003DMB000000756            |
|            | chr03  | 28.384        | chr00_8000147  | chr00:7515800..8485525   | PGSC0003DMB0000000254           |
|            | chr04  | 0             | chr00_12407838 | chr00:12173931..12667864 | PGSC0003DMB0000000431           |
|            | chr04  | 58.24         | chr00_38233239 | chr00:38228241..38233666 | PGSC0003DMB0000001643           |
|            | chr08  | 11.205        | chr00_31385668 | chr00:31364510..31394384 | PGSC0003DMB0000001091           |
|            | chr10  | 61.118        | chr00_23192845 | chr00:23101765..23217759 | PGSC0003DMB0000000798           |
|            | chr11  | 52.861        | chr00_20406095 | chr00:20257527..20437853 | PGSC0003DMB0000000715           |
| PAM FEMALE | chr01B | 51.832        | chr00_13962275 | chr00:13530242..13971654 | PGSC0003DMB0000000464           |
|            | chr01C | 0             | chr00_23427320 | chr00:23333778..23446661 | PGSC0003DMB0000000805           |
|            | chr02A | 61.108        | chr00_19558859 | chr00:19450431..19661773 | PGSC0003DMB0000000670           |
|            | chr05A | 12.092        | chr00_37599899 | chr00:37597868..37605383 | PGSC0003DMB0000001545           |
|            | chr05B | 45.958        | chr00_43541618 | chr00:43541215..43541950 | PGSC0003DMB0000004984           |
|            | chr05B | 47.434        | chr00_43541620 | chr00:43541215..43541950 | PGSC0003DMB0000004984           |
|            | chr07B | 140.205       | chr00_31495273 | chr00:31483820..31513220 | PGSC0003DMB0000001096           |
|            | chr07B | 141.778       | chr00_31495276 | chr00:31483820..31513220 | PGSC0003DMB0000001096           |
|            | chr07B | 137.612       | chr00_31495304 | chr00:31483820..31513220 | PGSC0003DMB0000001096           |
|            | chr08A | 7.861         | chr00_31385716 | chr00:31364510..31394384 | PGSC0003DMB0000001091           |
|            | chr09A | 33.917        | chr00_3813797  | chr00:1708939..3871400   | PGSC0003DMB0000000064           |
|            | chr09A | 34.708        | chr00_7044136  | chr00:6457363..7515699   | PGSC0003DMB0000000230           |
|            | chr09A | 39.603        | chr00_3499330  | chr00:1708939..3871400   | PGSC0003DMB0000000064           |
|            | chr09B | 0             | chr00_9486392  | chr00:9335487..10101367  | PGSC0003DMB0000000311           |
|            | chr09C | 22.756        | chr00_39245175 | chr00:39242151..39245446 | PGSC0003DMB0000001879           |
|            | chr09C | 10.507        | chr00_5896866  | chr00:6457363..7515699   | PGSC0003DMB0000000230           |
|            | chr09C | 10.521        | chr00_7044118  | chr00:5010086..6318492   | PGSC0003DMB0000000170           |
|            | chr10D | 6.82          | chr00_25981660 | chr00:25967526..26033986 | PGSC0003DMB0000000896           |
